# 1 **Deciphering how specialized interneuron-specific cell types** 2 **contribute to circuit function**

3 Alexandre Guet-McCreight<sup>1,2</sup> and, Frances K Skinner<sup>1,2,3</sup>

4 <sup>1</sup>*Krembil Research Institute, University Health Network, Toronto, ON, Canada*

5 <sup>2</sup>*Department of Physiology, University of Toronto, Toronto, ON, Canada*

6 <sup>3</sup>*Department of Medicine (Neurology), University of Toronto, Toronto, ON, Canada*

7 **Running title:** Interneuron specific cells sharpen recruitment

## 8 **Corresponding Author:**

9 Alexandre Guet-McCreight

10 alexandre.guet.mccreight@mail.utoronto.ca

11 University of Toronto

12 **Number of pages:** 33

13 **Number of figures:** 10

14 **Number of tables:** 0

15 **Number of words Abstract:** 246

16 **Number of words Significance Statement:** 119

17 **Number of words Introduction:** 642

18 **Number of words Discussion:** 1471

19 **Conflict of Interest:** The authors declare no competing financial interests.

20 **Acknowledgements:** This research was supported by the Natural Sciences and Engineering Research Council of

21 Canada (NSERC): Discovery Grant (RGPIN - 2016 - 06182) to FKS and Graduate Scholarship (CGSD2 - 504375 -

22 2017) to AGM. We thank L. Topolnik for reading and providing feedback on this manuscript.

## 23 **Abstract**

24 The wide diversity of inhibitory cells across the brain makes them fit to contribute to network dynamics in specialized  
25 fashions. However, the contributions of a particular inhibitory cell type in a behaving animal is challenging to decipher  
26 as one needs to both record cellular activities and identify the cell type being recorded. Thus, using computational  
27 modeling to explore cell-specific contributions so as to predict and hypothesize functional contributions is desirable.  
28 Here we examine potential contributions of interneuron-specific 3 (I-S3) cells - a type of inhibitory interneuron  
29 found in CA1 hippocampus that only targets other inhibitory interneurons - during simulated theta rhythms. We  
30 use previously developed multi-compartment models of oriens lacunosum-moleculare (OLM) cells, the main target of  
31 I-S3 cells, and explore how I-S3 cell inputs during *in vitro* and *in vivo* scenarios contribute to theta. We find that I-S3  
32 cells suppress OLM cell spiking, rather than engender its spiking via post-inhibitory rebound mechanisms. To elicit  
33 recruitment similar to experiment, the inclusion of disinhibited pyramidal cell inputs is necessary, suggesting that I-S3  
34 cell firing can broaden the window for disinhibiting pyramidal cells. Using *in vivo* virtual networks, we show that I-S3  
35 cells can contribute to a sharpening of OLM cell recruitment at theta frequencies. Further, a shifting of the timing of  
36 I-S3 cell spiking due to external modulation can shift the timing of the OLM cell firing and thus disinhibitory windows.  
37 We thus propose a specialized contribution of I-S3 cells to create temporally precise coordination of modulation  
38 pathways.

## 39 **Significance Statement**

40 How information is processed across different brain structures is an important question that relates to the different  
41 functions that the brain performs. In this work we use computational models that focus on a particular inhibitory cell  
42 type that only inhibits other inhibitory cell types – the I-S3 cell in the hippocampus. We show that this cell type is able  
43 to broaden the window for disinhibition of excitatory cells. We further illustrate that this broadening presents itself  
44 as a mechanism for input pathway switching and modulation over the timing of inhibitory cell spiking. Overall, this  
45 work contributes to our knowledge of how coordination between sensory and memory consolidation information is  
46 attained in a brain area that is involved in memory formation.

## 47 **Introduction**

48 Across the brain there is a variety of different types of excitatory and inhibitory neurons that control how information  
49 is processed (Bezaire and Soltesz, 2013; Cembrowski and Spruston, 2019; Klausberger and Somogyi, 2008; Markram  
50 et al., 2004; Pelkey et al., 2017; Tremblay et al., 2016). This diversity spans morphological, electrophysiological  
51 and molecular aspects, and examination of specific inhibitory cell types shows that there are distinct neuronal classes  
52 that can be mapped to function and behaviour (Kepecs and Fishell, 2014). However, identifying a cell type goes  
53 beyond characterization of any single genetic marker making such mappings a difficult endeavour. Explorations of  
54 inhibitory cells have additional challenges since they are typically smaller in size and are rarer than their excitatory  
55 cell counterparts, making them more difficult to record from *in vivo*. Even though there are conceptual and technical  
56 challenges in classifying cell types, it is clear, for example, that brain diseases can be specific in the cell types that they  
57 affect (Zeng and Sanes, 2017).

58 The CA1 hippocampus, a brain area associated with memory formation, stands out in the field by the vast amount  
59 of experimental literature characterizing its inhibitory cell types (Bezaire and Soltesz, 2013; Harris et al., 2018;  
60 Klausberger and Somogyi, 2008; Pelkey et al., 2017). Of them, we here focus on the interneuron-specific 3 (I-S3)  
61 cell type, a type of interneuron that expresses vasoactive intestinal polypeptide (VIP) and calretinin (CR). This  
62 cell type is unique in that it only inhibits other inhibitory cell types and not pyramidal cells (Acsády et al., 1996;  
63 Chamberland et al., 2010; Chamberland and Topolnik, 2012; Tyan et al., 2014; Luo et al., 2020; Guet-McCreight et  
64 al., 2020). More specifically, the primary target of I-S3 cells are oriens lacunosum moleculare (OLM) cells, a cell  
65 type that commonly expresses somatostatin (SOM) and inhibits the distal apical dendrites of pyramidal cells in CA1.  
66 Pyramidal cells represent by far the largest proportion of cells in the CA1 network (Bezaire and Soltesz, 2013; Pelkey  
67 et al., 2017). Inputs carrying “sensory-related information” from entorhinal cortex synapse onto their distal dendrites,  
68 and inputs carrying “retrieval-related information” from CA3 synapse onto their proximal dendrites (Klausberger  
69 and Somogyi, 2008; Siegle and Wilson, 2014). The OLM cells have been shown to gate sensory encoding via the  
70 inhibition of pyramidal cell distal dendrites (Leão et al., 2012; Siwani et al., 2018), and I-S3 cells are thus well  
71 placed for input-specific information gating in the CA1 area. This dis-inhibitory circuitry (i.e., I-S3 cell inhibition  
72 of OLM cells causing disinhibition of pyramidal cells) is not necessarily unique to the hippocampus since strikingly  
73 similar circuitries with VIP+ and SOM+ cell types have also been reported across several different areas of cortex  
74 (Guet-McCreight et al., 2020). Generally speaking, activation of VIP+ cells *in vivo* across different cortical areas has  
75 been associated with improved performances in a variety of different learning and memory paradigms as well as the  
76 facilitation of synaptic potentiation in pyramidal cells (Guet-McCreight et al., 2020).

77 In CA1, both the timing of spiking across different cell types (Bezaire et al., 2016; Klausberger and Somogyi, 2008;  
78 Mizuseki et al., 2009), as well as encoding of sensory and retrieval information (Siegle and Wilson, 2014) are known to  
79 co-occur at distinct phases of theta rhythms (4-12 Hz), which are present during movement and preparatory behaviors

80 (Buzsáki, 2002; Colgin, 2016). In this study, we use computational modelling to examine and compare simulated *in*  
81 *vitro* and *in vivo* states in OLM cells (Guet-McCreight and Skinner, 2020) so as to dissect out possible contributions of  
82 I-S3 cells in particular. We find that I-S3 cells could contribute to function by suppressing spiking in OLM cells and  
83 broadening the window for the synaptic disinhibition of pyramidal cells. Overall, our work shows that close interfacing  
84 of computational and experimental studies can help us make progress toward the challenging endeavour of mapping  
85 specialized cell types to function and behaviour.

## 86 **Materials and Methods**

### 87 *Models of neurons and synapses, and generating in vivo-like (IVL) states*

88 The models upon which the present work is based have been previously published. Detailed descriptions of these  
89 models with equations and parameter values can be accessed starting from Guet-McCreight and Skinner (2020).  
90 Here we provide a brief description. Two morphologically detailed multi-compartment OLM cell models, cell 1  
91 and cell 2 (Sekulic et al., 2020), were developed in NEURON (Carnevale and Hines, 2006). Both cell models were  
92 constructed using morphological and electrophysiology data from intermediate CA1 mouse hippocampus. Code  
93 for the models is available from <https://github.com/FKSkinnerLab/OLMng>. Ion channel mechanisms  
94 include: hyperpolarization-activated cation channels (*H*), transient sodium (*NaT*), fast and slow delayed rectifier  
95 potassium (*Kdrf*, *Kdrs*), A-type potassium (*A*), M-type potassium (*M*), T- and L-type calcium (*CaT*, *CaL*), and  
96 calcium-dependent potassium (*KCa*) channels. All of these mechanisms are distributed throughout the cell, with *CaT*,  
97 *CaL*, and *KCa* being inserted only in dendritic compartments, the rest inserted in somatic and dendritic compartments,  
98 and *NaT*, *Kdrf*, and *Kdrs* also being inserted in axonal compartments. We refer to currents generated by the different  
99 ion channel mechanisms with subscripts. The two OLM cell models were developed using the same biological OLM  
100 cell for each model, and are the most up-to-date OLM cell models currently available (Sekulic et al., 2020). Although  
101 each of these models represent OLM cells as captured by mimicking the electrophysiological recording outputs from  
102 the particular biological cell, they differ in their detailed morphologies and conductance values for each of the various  
103 ion channel mechanisms. Throughout the paper we use both models so as to consider whether these differences would  
104 affect our results.

105 For the synapse model we use NEURON's built-in Exp2Syn function. The input populations to OLM cells include:  
106 I-S3 cell inputs, GABAergic long-range projecting inputs from medial septum (MS), bistratified cell inputs (BIS),  
107 and local pyramidal (PYR) cell inputs [I-S3 cells & MS: see Chamberland et al. (2010); BIS & PYR cells: see  
108 Leão et al. (2012)]. In the absence of specific constraints, these inputs are distributed randomly across all dendritic  
109 compartments. OLM cells also receive inputs locally from long-range projecting VIP+ cells in CA1 (Francavilla et al.,  
110 2018), though because these cells are silent during theta rhythms, we did not include them in this study. In previous  
111 work, we had performed optimizations of synaptic conductances across dendritic compartments so as to estimate the

112 weights for each input type. We obtained increasing values with distance from soma ( $G_{PYR} = 0.00020$  to  $0.00082 \mu\text{S}$ ;  
113  $G_{MS} = 0.00024$  to  $0.00132 \mu\text{S}$ ;  $G_{I-S3} = 0.00018$  to  $0.00068 \mu\text{S}$ ;  $G_{BIS} = 0.00021$  to  $0.00100 \mu\text{S}$ ). Consideration of  
114 other inputs and further details can be found in Guet-McCreight and Skinner (2020).

115 In previous work using I-S3 cell models (Guet-McCreight and Skinner, 2019), we had developed an approach for  
116 performing high-resolution parameter searches in parallel on the Neuroscience Gateway (NSG) for high-performance  
117 computing (Sivagnanam et al., 2013) to find synaptic input parameter combinations (i.e. excitatory and inhibitory  
118 numbers of synapses and spike rates) that could generate *in vivo*-like (IVL) states. In Guet-McCreight and Skinner (2020)  
119 we did the same for OLM cells. IVL states resulted in synaptic parameter values for cell 1 of 1268 excitatory synapses  
120 firing at 1.6 Hz and 1254 inhibitory synapses firing at 8.7 Hz, and for cell 2, 1503 excitatory synapses firing at 1.5 Hz  
121 and 1532 inhibitory synapses firing at 8 Hz, distributed throughout the dendritic tree.

## 122 *Approaches and data analyses*

123 To investigate the experimental results from Tyan et al. (2014), we use a similar protocol in our computational models  
124 where we first depolarize the cell model enough to attain a spike rate of 7.25 Hz. We then activate select input  
125 populations at different frequencies in our models. The synaptic locations for the inputs are chosen randomly across  
126 the dendritic arbour of OLM cells (**Fig. 2**), as was done previously (Guet-McCreight and Skinner, 2020). Although  
127 we look at a variety of different input schemes to gauge possible contributions of different network components, we  
128 focus on displaying results that explore the contributions from I-S3 cell inputs.

129 To compute the phase response ( $\Delta\Phi$ ; **Fig. 4B**), we obtain the interspike interval of the two spikes preceding the  
130 perturbation ( $T0$ ) and the interspike interval between the last spike preceding the perturbation and the first spike  
131 following the perturbation ( $T1$ ). We calculate the phase response as follows:

$$\Delta\Phi = \frac{T1 - T0}{T0} \times 100 \quad (1)$$

132 In this sense, the phase response is normalized to 1 and converted to a percent. A negative value means a phase  
133 advance, or a shortening of the interspike interval. A positive value means a phase delay, or a lengthening of the  
134 interspike interval. To compute the change in currents (i.e. same calculation used for each current type; **Fig. 4C**)  
135 caused by the perturbation, we obtain the peak current amplitude generated in the period from the 2nd last spike  
136 preceding the perturbation to the perturbation time ( $I0$ ), and the peak current amplitude generated in the period from  
137 the perturbation time to the 2nd spike following the perturbation ( $I1$ ). Percent change in peak current is calculated as  
138 follows:

$$\Delta I = \frac{I1 - I0}{I0} \times 100 \quad (2)$$

139 As such, positive values indicate percent increases in peak current amplitude, and negative values indicate percent  
140 decreases in peak current amplitude.

141 To examine spiking resonance in *in vitro* states, we generate 50 different baseline spike rates in our OLM models  
142 by applying a range of holding currents from 30-152.5 pA (cell 1) and 22-144.5 pA (cell 2) - note that plots of the  
143 frequency-current relationships of these models have been reported previously (Guet-McCreight and Skinner, 2020).  
144 This elicits a range of baseline spike rates from about 1-35 Hz in both models. Each of these models is then subjected  
145 to a range of inputs at different input frequencies (0.5 - 30 Hz) to determine spike resonance frequencies.

146 To examine spiking resonance in *in vivo* states, we also generate 50 different baseline spike rates in our OLM models.  
147 However, this is done by changing the random seed that controls placement of synapses and presynaptic spike times,  
148 rather than by changing the holding current since this is not what would be the case *in vivo*. This also generates  
149 different spike rates (across random seeds), though not with as wide of a range as changing the holding current in the  
150 *in vitro* case. We obtain 50 baseline spike rates by using 50 different random seeds.

151 For all of these models, we compute the baseline spike rate ( $f_B$ ) and power spectral density (PSD) of the spike train  
152 (1's for spikes and 0's for no spikes). The PSD is computed in python using the welch function available as part of  
153 the scipy module: `signal.welch(signal, fs=1/dt, scaling='density', nperseg=20000)`. We  
154 then apply a series of different input frequencies ( $f_I$ ), and using different input populations, and the PSD is computed  
155 following each input frequency. The different input populations (left to right in **Fig. 5**) are: 30 frequency-modulated  
156 I-S3 cell inputs, 30 frequency-modulated PYR cell inputs, and 30 frequency-modulated inputs from each input  
157 populations (i.e. I-S3, MS, BIS, and PYR cells), with start time delays from each other based on their relative timing  
158 during theta rhythms (Bezaire et al., 2016; Hangya et al., 2009; Luo et al., 2020). Specifically, these start times  
159 (phases) relative to a 125 ms theta cycle are the following: I-S3, 45°; MS, 225°; BIS, 270°; PYR, 270°. We note that  
160 the choice to use 30 I-S3 synapses is because at this number of synapses, I-S3 cell synaptic activation can exhibit a  
161 sufficient level of synaptic control over OLM cell spiking at 5 Hz in both models (**Fig. 3A**). The choice to use the  
162 same numbers of PYR cell, MS cell, and BIS cell synapses is simply to keep the numbers equivalent in the absence of  
163 appropriate experimental data obtained in this context to constrain these numbers.

164 To gauge spike frequency resonance, we use a ratio to baseline measurement (i.e. 'baseline ratio' or  $\delta PSD$ ), which  
165 is computed by dividing the PSD at the  $f_I$  by the PSD at the  $f_I$  in the corresponding baseline trace (i.e. without the  
166 modulatory inputs):

$$\delta PSD = \frac{PSD_{f_I \text{ modulated}}}{PSD_{f_I \text{ baseline}}} \quad (3)$$

167 In other words, it is a measurement of how much the PSD at the  $f_I$  changes relative to baseline once modulatory inputs  
168 are added. A value of 1 would therefore indicate that there is no change in PSD, values less than 1 indicate a decrease  
169 in PSD, and values greater than 1 indicate an increase in PSD.

## 170 Results

171 In the CA1 hippocampus, there are four known types of interneuron-specific (I-S) cells, interneurons that are specialized  
172 to primarily target other interneurons. In particular, VIP/CR+ I-S3 cells have OLM cells as their primary target. Given  
173 this, we take advantage of our computational models and approaches to examine I-S3 cell contributions in hippocampal  
174 circuits from the perspective of I-S3 cell control over OLM cell spiking.

### 175 *I-S3 cell control over OLM cell spiking - multiple possibilities*

176 *In vitro*, optogenetic activation of CR+ cells, which includes I-S3 cells, can preferentially control the timing of OLM  
177 cell spiking at 5 and 10 Hz, but not 1 and 20 Hz. Tyan et al. (2014) considered that this was achieved through  
178 post-inhibitory rebound (PIR) spiking mechanisms. However, because other inhibitory synapses and excitatory synapses  
179 were not blocked in these experiments, it is unclear whether this is primarily due to network effects or to intrinsic OLM  
180 cell properties that promote PIR spiking. As well, it is unknown whether and how these *in vitro* findings would translate  
181 to similar contributions in a behaving animal. Targeting and dissecting out the contributions of I-S3 cell inputs to OLM  
182 cell spiking *in vivo* would be technically difficult experiments to perform. OLM cells exhibit prominent sag currents  
183 which are due to hyperpolarization-activated cation channels (h-channels) (Maccaferri and McBain, 1996; Sekulic et  
184 al., 2020; Zemankovics et al., 2010), and can promote PIR spiking (Ascoli et al., 2010). H-channels are also thought to  
185 contribute to spike resonance properties in OLM cells *in vivo* at theta frequencies, but this has only been tested *in vitro*  
186 using dynamic-clamp experimental techniques (Kispersky et al., 2012), as well as *in silico* using multi-compartment  
187 modelling (Sekulić and Skinner, 2017). *In vitro*, OLM cells phase-lock well to theta frequency-modulated inputs,  
188 and this finding is independent of whether h-channels are blocked (Kispersky et al., 2012). However, since the  
189 dynamic-clamp experiments injected synaptic currents at the soma, possible contributions of dendritic h-channels  
190 could not be assessed. This was more fully explored in a modeling study that used somatodendritically distributed  
191 synapses on OLM cell multi-compartment models to simulate *in vivo*-like states in the presence or absence of dendritic  
192 h-channels (Sekulić and Skinner, 2017). It was found that there was a shift in spike resonance from high to low  
193 theta frequencies if, respectively, dendritic h-channels were present or not (Sekulić and Skinner, 2017). Here, with  
194 our state-of-the-art OLM cell models and explicit *in vivo*-like states, we can explore this specifically from I-S3 cell  
195 perspectives.

196 There are several ways in which I-S3 cells could manifest their control over OLM cells. If it is primarily through  
197 PIR spiking, this would imply that inhibitory perturbations from I-S3 cells to OLM cells would essentially speed up  
198 the onset of a spike (**Fig. 1A**), due to intrinsic OLM cell mechanisms such as  $I_H$ ,  $I_{CaT}$ , and  $I_M$  that would interact  
199 with the incoming inhibitory perturbations. However, there are other ways in which I-S3 cells could have an effect on  
200 OLM cells in the hippocampal circuitry. I-S3 cells could be controlling the timing of OLM cell spiking by suppressing  
201 spikes that would occur between OLM cell's spiking otherwise (**Fig. 1B**). This would require OLM cells to be spiking

202 faster than the frequency at which I-S3 cells are activated to exert their control. Since during the *in vitro* experimental  
203 recordings (Tyan et al., 2014), the average spike rate of the OLM cells is 7.3 Hz and OLM cells could be recruited  
204 to spike at 10 Hz photo-activation patterns, this is unlikely to be the case. In either case, whether inhibitory inputs  
205 alone can suppress spiking or cause PIR spiking, depends on specific conductance densities and the interplay between  
206 different conductances. It is also possible that photoactivation of I-S3 cells might also have the general effect of  
207 disinhibiting PYR cells (**Fig. 1C**), which could then further phase lock the spiking of OLM cells through recurrent  
208 excitation. We note that there are additional ways in which I-S3 cells could control OLM cell spiking that involve  
209 other cell types. That is, it is possible that inhibition of BIS cells by I-S3 cell activation could contribute towards  
210 disinhibiting PYR cells, which could further augment recurrent excitation to OLM cells in an ‘I-S3 to BIS to PYR  
211 to OLM cell’ type pathway. It is also possible that inhibition of BIS cells could contribute to additional inhibition of  
212 OLM cells in an ‘I-S3 to BIS to OLM cell’ type pathway. Since we are examining virtual networks from an OLM  
213 cell perspective, these additional pathways cannot be directly explored in our simulations. However, these additional  
214 possibilities are essentially enhancements to the three scenarios shown in **Fig. 1** that we do consider.

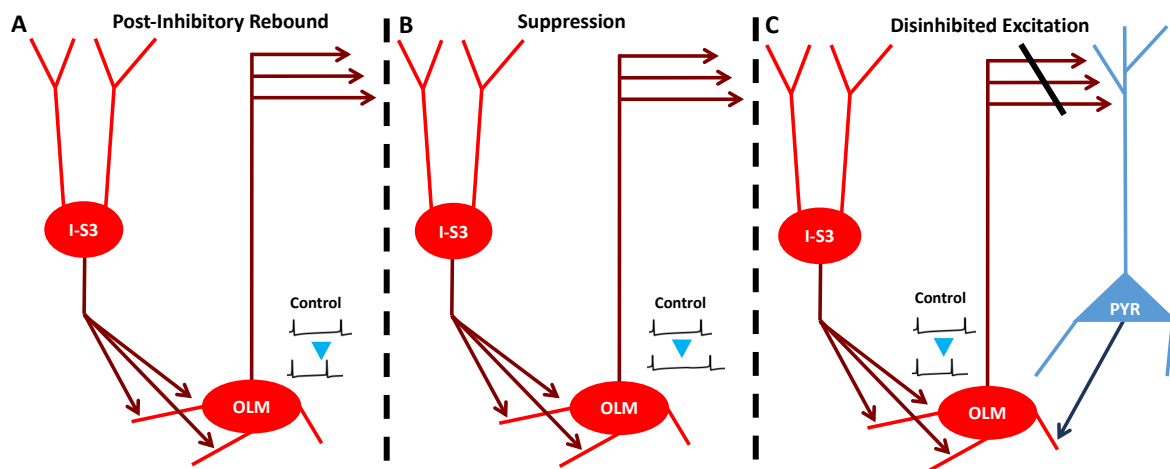

**Figure 1. Potential mechanisms through which I-S3 cell activation can control OLM cell spiking.** **A:** I-S3 cell inputs can time the activity of OLM cells through inhibitory perturbations that generate post-inhibitory rebound (PIR) spiking. **B:** I-S3 cell inputs can suppress spikes and time OLM cell spiking by lengthening their interspike intervals. **C:** I-S3 cell inputs can lead to disinhibition of PYR cells such that they can directly excite OLM cells to spike.

215 *I-S3 cell input populations alone do not fully entrain OLM cell spiking*

216 Let us first examine how I-S3 cell synaptic inputs alone could control OLM cell output. Here we used optimized  
217 synaptic parameters in each compartment of the OLM cell models (Guet-McCreight and Skinner, 2020) so as to  
218 capture the amplitudes and kinetics previously reported experimentally for MS and I-S3 cell inputs (Chamberland et  
219 al., 2010), as well as BIS and PYR cell inputs (Leão et al., 2012). For a full description of this methodology, see



220 Guet-McCreight and Skinner (2020). An example of I-S3 cell synaptic input distributed on the OLM cell models is  
221 shown in **Fig. 2A**. We apply I-S3 cell synaptic inputs alone with rhythmic spiking at 1 Hz, 5 Hz, 8 Hz, 10 Hz, and 20  
222 Hz and using 0 to 60 synapses. Resulting output from OLM cell models is shown in **Fig. 3A**. In looking at the spike  
223 traces across both cell 1 and cell 2, entrainment by the I-S3 cell synapses occurs primarily at 5 Hz when there is a  
224 large enough number of frequency-modulated synapses. At higher frequencies, however, I-S3 cell inhibitory synapses  
225 only lead to spiking on every other cycle. For example, at 10 Hz stimulation with 30 I-S3 cell synapses, the OLM cell  
226 models spike at 5 Hz. This is in stark contrast with the experimental results that show that OLM cells spike at 10 Hz  
227 when receiving 10 Hz inhibition from CR+ cells (Tyan et al., 2014). This suggests that I-S3 cell synapses could delay  
228 the spiking of OLM cells on each cycle, which is contrary to what one would expect if PIR mechanisms in OLM cells  
229 were playing a large part. That is, the simulations indicate that I-S3 cells cause phase-delays and not phase-advances  
230 of OLM cell spiking. We also tested the inclusion of other inhibitory populations [e.g. MS cell inputs, which were  
231 reported by Chamberland et al. (2010) to have comparatively larger IPSC amplitudes than I-S3 cell inputs], as well as  
232 clustering I-S3 cell synapses on distal or proximal dendrites [i.e. since I-S3 cell IPSC amplitudes from Chamberland  
233 et al. (2010) suggest preferred distal localization of I-S3 cell synapses], and these manipulations did not lead to better  
234 spike entrainment at 10 Hz frequencies (not shown). We note that IPSP magnitudes are comparable (**Fig. 3D**) to those  
235 generated experimentally during wide-field optogenetic stimulation of CR+ cells (Tyan et al., 2014). However, this  
236 blown-up trace also highlights that the amplitude of IPSPs are dependent on their timing relative to the after spike  
237 hyperpolarization portion of the trace, which causes reduced IPSP amplitudes.

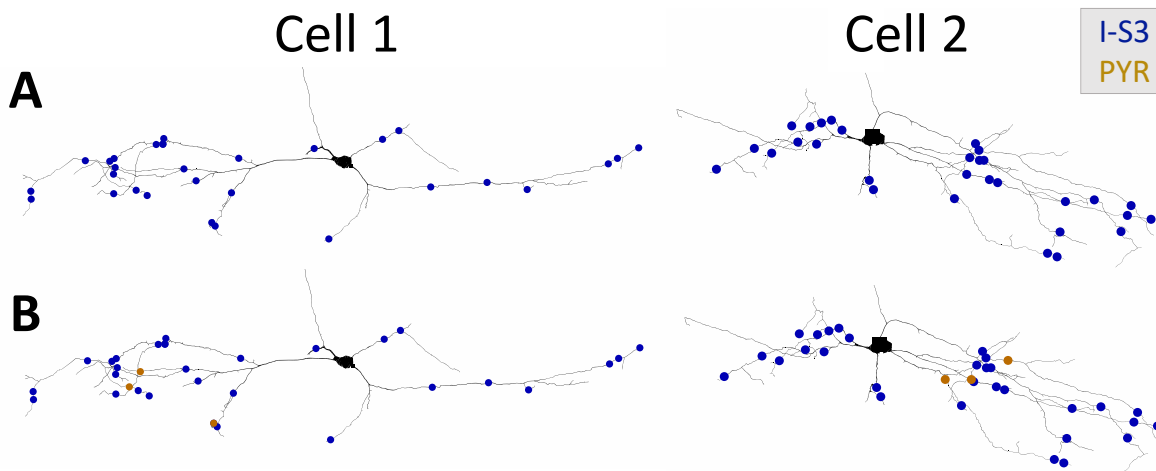

**Figure 2. Example locations of synaptic inputs. A:** Example synaptic locations of 30 I-S3 cell inputs. **B:** Example synaptic locations of 30 I-S3 cell inputs and 3 PYR cell inputs.

238 If we also include a few frequency-modulated PYR cell synapses (i.e. enough to generate spiking) on the OLM cell  
239 models (see **Fig. 2B**), we could obtain the level of spike entrainment (**Fig. 3B & E**) previously seen in experiment  
240 (Tyan et al., 2014). However, this entrainment is strong up to 20 Hz as well, which is unlike what is seen experimentally

241 (Tyan et al., 2014). The inclusion of frequency-modulated inputs from both I-S3 and PYR cells is ‘virtual’, meaning  
242 that we are not explicitly modelling I-S3 and PYR cells in a circuit configuration with the OLM cell models. That  
243 is, our virtual network simulations assume that PYR cells will spike at 20 Hz as there is no explicit modeling of  
244 tri-synaptic connectivity between I-S3 cells, OLM cells, and PYR cells. Thus a possible interpretation is that while the  
245 modeling cannot differentiate between the different frequency-modulated synapses, experimentally, photo-activation  
246 of CR+ cells at 20 Hz may not lead to PYR cell spiking at 20 Hz by disinhibition (**Fig. 1C**) to influence OLM cells  
247 at these higher frequencies. Additionally, wide-field optogenetic stimulation of CR+ cells in Tyan et al. (2014) was  
248 often capable of generating 2-3 OLM cell action potentials. This effect was not captured when scaling up I-S3 cell  
249 inputs alone (**Fig. 3A**) or with a minimal number of PYR cell inputs (**Fig. 3B**). In scaling up the number of PYR  
250 cell inputs, however, we find that this effect can be replicated (**Fig. 3C & F**). As such, our simulations suggest that  
251 wide-field activation of CR+ cells, that includes I-S3 cells, disinhibits a large enough number of PYR cells to cause a  
252 robust recruitment of OLM cells to spike.

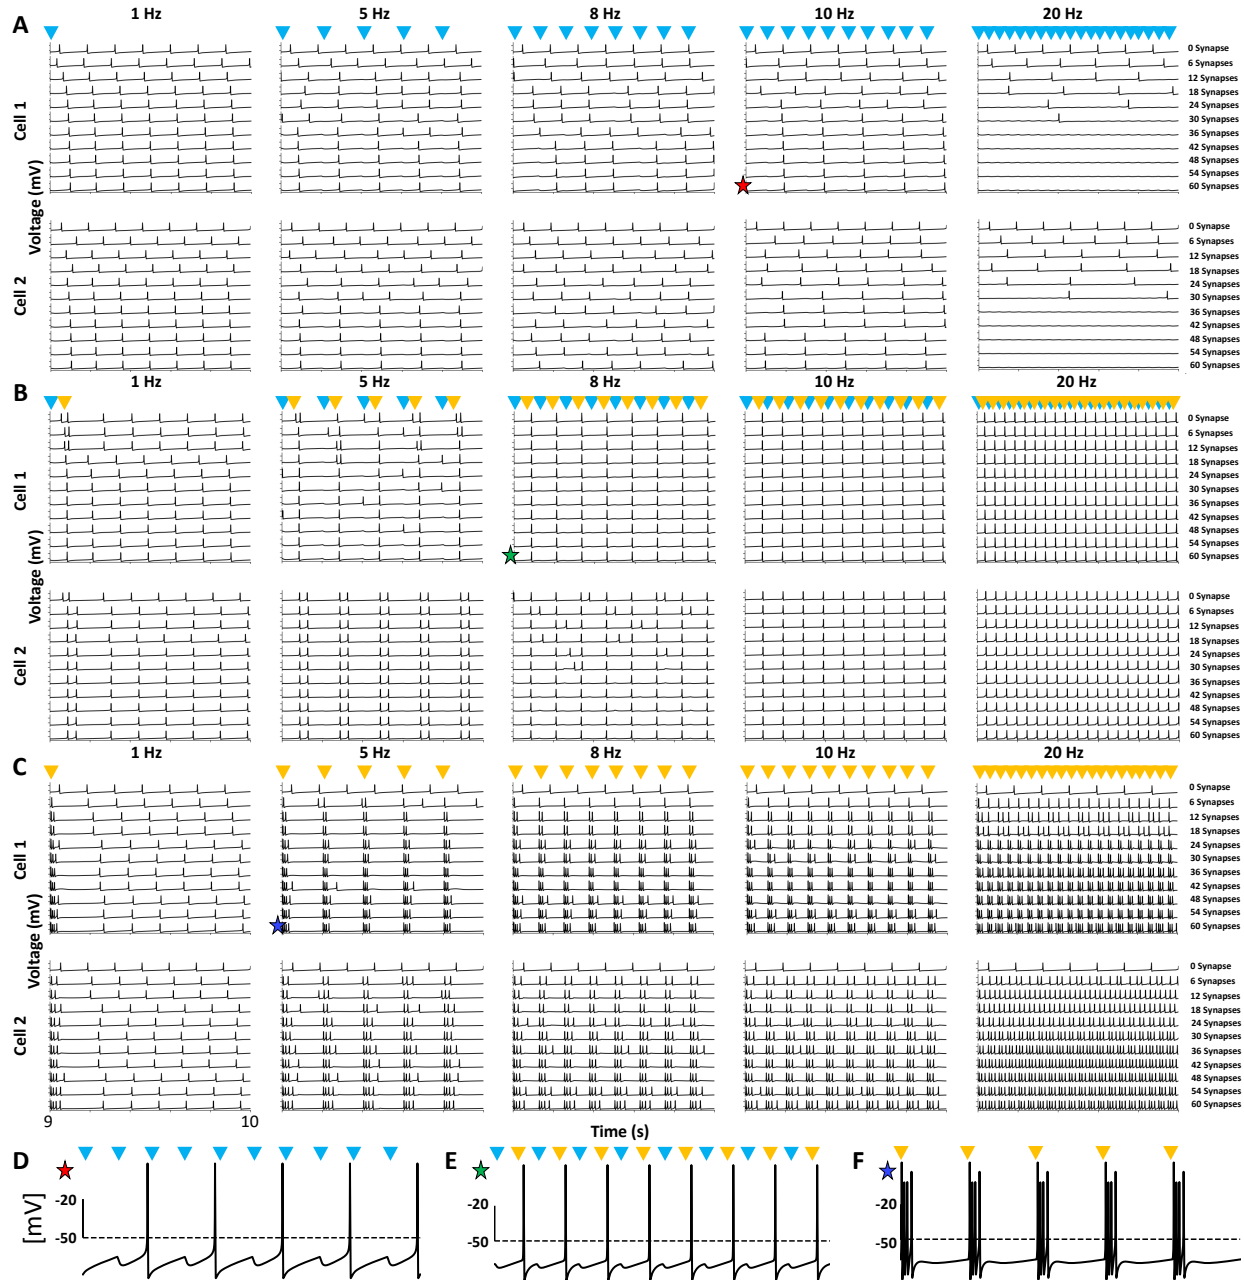

**Figure 3. I-S3 cell inputs alone cannot elicit PIR spiking in OLM cells at higher than baseline spike rate frequencies.** **A:** Simulated voltage traces in the 9-10s simulation times across several frequency-modulated I-S3 cell inhibitory frequencies (left to right) and numbers of I-S3 cell synapses (top to bottom). Blue arrows indicate times when I-S3 cell synapses are activated. For each voltage trace axis, the two notches indicate voltages of -50 mV and 0 mV. **B:** Same as in A but with inclusion of 3 PYR cell inputs (timing indicated by the yellow arrows). Note that this number of PYR cell inputs is fixed across simulations. **C:** Same as in A but with a scaling up of PYR cell inputs alone instead of I-S3 cell inputs alone. **D-F:** Blown up versions of the traces highlighted by the stars in A-C, respectively.

253 *Inhibitory perturbations rarely elicit post-inhibitory rebound (PIR) spiking*

254 To further unpack why the OLM cell models do not exhibit phase advancements in response to inhibitory perturbations,  
255 we turn to phase response curves (PRCs). PRCs are used in studies of oscillatory systems such as neuronal spiking  
256 (Rinzel and Ermentrout, 1989; Schultheiss et al., 2011). Specifically, they are used to indicate the change in the cycle  
257 period as a function of the phase at which a perturbation is received, thus predicting its response to rhythmic inputs.  
258 In the case of a spiking neuron, this would therefore be a change in the interspike interval. We compute the PRCs  
259 at two baseline spike rates in the OLM cell models (just past rheobase and 7.25 Hz) and use 30 I-S3 cell synapses  
260 spread randomly across the dendritic tree as the inhibitory perturbation (**Figs. 2A** and **4A**). Across these two different  
261 baseline spike rates, phase delays are almost always present in response to inhibitory perturbations, with the smallest  
262 phase delay occurring when the perturbation is during the spike refractory period, and the largest phase delay occurring  
263 when the perturbation is just before spike threshold (**Fig. 4B**, 7.25 Hz). At the lower baseline spike rate (**Fig. 4B**,  
264 rheobase), phase advances can occur when the perturbation occurs at near 40% of the interspike interval, however  
265 these are small phase advancements (negative values), and only occur with cell 1, and not with cell 2.

266 With our OLM cell models in hand, we can also examine perturbation phase-dependent shift in amplitudes of the  
267 different currents from the various ion channel mechanisms including  $I_H$ ,  $I_M$ ,  $I_{CaL}$ ,  $I_{CaT}$ , and  $I_{K_A}$ . This is shown in **Fig.**  
268 **4C** at two different OLM cell firing frequencies. Specifically, at frequencies observed experimentally (7.25 Hz; two  
269 lower plots), we obtain phase-dependent increases in  $I_H$  (cyan), and  $I_{CaL}$  (yellow), and decreases in  $I_M$  (purple), which  
270 should all enhance the likelihood of PIR spiking (i.e. more inward current and less outward current). We note that in  
271 all cases maximal  $I_{CaT}$  (grey) is decreased following the inhibitory perturbation, regardless of the perturbation phase,  
272 but is steadily decreased less at later phases of the interspike interval. A phase-dependent increase, albeit a small one,  
273 in  $I_{K_A}$  (blue), however, would counteract rebound firing since  $I_{K_A}$  is known to suppress PIR spiking (Ascoli et al.,  
274 2010). It should be noted that contributions from  $I_{K_A}$  are large in these models, which could partially account for the  
275 lack of inhibitory perturbation-dependent phase advances. Other currents ( $I_{Kdrf}$ : orange,  $I_{Kdrs}$ : green,  $I_{KCa}$ : red,  $I_{Na}$ :  
276 pink,  $I_L$ : brown) did not show appreciable inhibitory perturbation phase-dependent changes in maximal magnitude.

277 At the lower baseline spike rates however (i.e. near rheobase; **Fig. 4**, top two plots), only the  $I_H$  current shows an  
278 appreciable perturbation phase-dependent shift in amplitude, with the peak amplitude occurring when the perturbation  
279 is at 40% of the interspike interval, which corresponds to the perturbation timing that can cause phase advancements.  
280 These results suggest that PIR mechanisms that can lead to phase advances in OLM cells will primarily be mediated by  
281  $I_H$  activation, and only when the OLM cell is spiking at the lower spike rates. Possibly, large perturbation-dependent  
282 enhancements in contributions from  $I_{K_A}$  contribute towards the prevention of phase advances from occurring more  
283 broadly across higher spike rates. Since  $I_{K_A}$  phase-dependence near rheobase is flat compared to at higher spike rates,  
284 this may also account for why some phase advances are permitted near rheobase. Though there is a difference in PRCs  
285 across the two models at lower baseline spike rates, the ion channel current responses are consistent. One potential

286 reason for the difference is a lower  $I_H$  output in cell 2 compared to cell 1 (**Fig. 4C**), which would explain why phase  
287 advances at lower baseline spike rates could be seen in cell 1 but not cell 2. Altogether, these results suggest that  
288 inhibitory inputs alone, via I-S3 cells, are not sufficient to elicit PIR mechanisms in OLM cells. Rather, the modeling  
289 predicts that I-S3 cell activation suppresses OLM cell spiking (i.e. causing spike phase delays), which in turn would  
290 allow disinhibition of PYR cells which could then entrain OLM cell spiking through recurrent excitation.

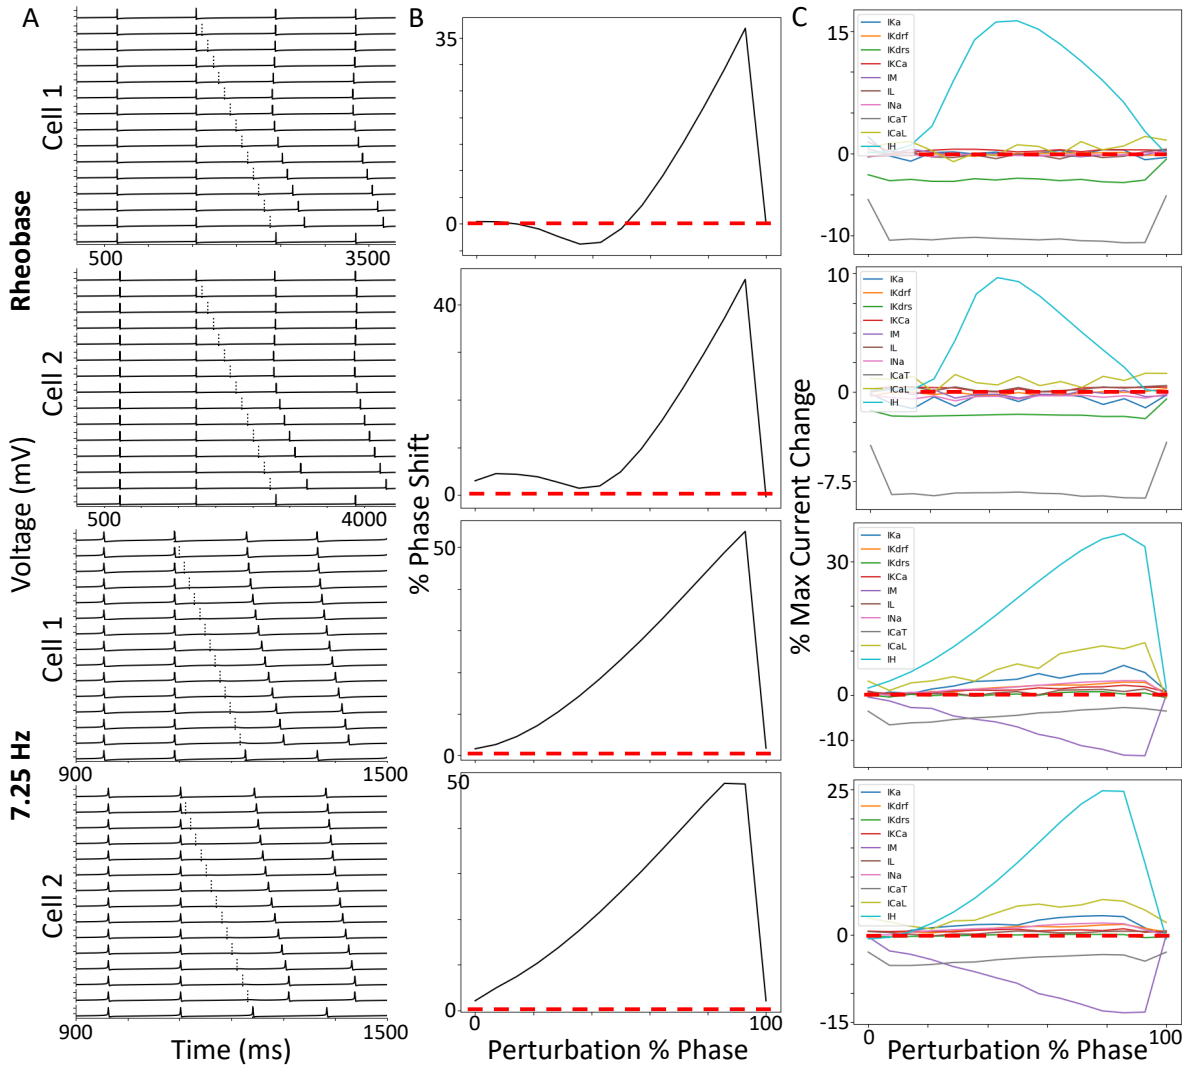

**Figure 4. Inhibitory perturbations alone mostly just cause phase delays in OLM cell models.** **A:** Voltage traces (the two notches on each y-axis are -50 mV and 0 mV) illustrating the phase response curve protocols at two different baseline frequencies (rheobase and 7.25 Hz), where the inhibitory perturbation (30 I-S3 cell synapses indicated by the dashed line in each trace), is moved from earlier (0%) to later (100%) phases of an interspike interval cycle. **B:** Resulting PRCs where more positive phase shifts indicate larger phase delays. **C:** Perturbation phase-dependent changes in peak current amplitude for each ion channel present in the model. Currents are colored as follows (same order as in legend):  $I_{K_A}$  (blue),  $I_{K_{drf}}$  (orange),  $I_{K_{drs}}$  (green),  $I_{K_{Ca}}$  (red),  $I_M$  (purple),  $I_L$  (brown),  $I_{Na}$  (pink),  $I_{CaT}$  (grey),  $I_{CaL}$  (yellow), and  $I_H$  (cyan). In these plots,  $I_H$  (cyan) shows the largest phase-dependent increases in maximal current magnitude. The dashed red line indicates the zero line in B and C plots. The measurements shown here are extracted from current traces obtained from the first dendritic compartment adjacent to the soma since calcium channels are not present in the somatic compartments.

291 *In vitro* spike resonance is dependent on baseline spike rate

292 So far we have limited our explorations to a few input frequencies and baseline spike rates based on previous experimental  
293 explorations (Tyan et al., 2014). However, from analyzing these results it is clear that inhibitory modulation is strongly  
294 dependent on the baseline firing rate of the OLM cell ( $f_B$ ), as well as the frequency of the incoming frequency-modulated  
295 synaptic inputs ( $f_I$ ), though the precise relationship between the two is unclear. In this section we unpack this question  
296 by incrementally changing the holding current to elicit different baseline spike rates (i.e. 1-35 Hz), while at the same  
297 time submitting the model at each holding current to a barrage of different input frequencies. We note that this range  
298 of baseline spike rates approximately spans the range of spike rates that have been reported for OLM cells *in vivo*  
299 across different behavioral and network states (Katona et al., 2014; Varga et al., 2012). In this way we can establish a  
300 'ground-truth' regarding preferred output responses of OLM cells in the face of various input frequencies, i.e., an OLM  
301 cell spiking resonance, given different baseline spike rates in an *in vitro* context. After this, we will turn to examining  
302 what OLM cell spike resonance might look like in an *in vivo* context. The *in vitro* context simply means that the  
303 OLM cells are not bombarded with excitatory and inhibitory synaptic inputs and we simply apply the various holding  
304 currents to the somatic compartment and rhythmic putative synaptic input activations on dendritic compartments due  
305 to potential optogenetic experiments.

306 In **Fig. 5A1-C1** we show the spike resonant frequencies ( $f_R$ ) of OLM cells when receiving inhibitory inputs from  
307 I-S3 cells, or excitatory inputs from PYR cells, or inputs from all populations (i.e. including MS and BIS inputs). We  
308 define  $f_R$  as the input frequency generating the largest baseline ratio. When receiving only I-S3 cell inhibitory inputs,  
309  $f_R$  is largely dependent on  $f_B$ . That is, if the OLM cell is firing at a higher rate, then  $f_R$  is also higher. This can be seen  
310 more clearly in **Fig. 5A2**, which also highlights that  $f_R$  can also occasionally be larger than  $f_B$ , despite having spike  
311 rates at  $f_R$  that are always suppressed compared to  $f_B$  (**Fig. 5A3**; i.e. consistent with the phase delays due to inhibitory  
312 perturbations reported in previous sections). One explanation for this is that when the baseline ratio is enhanced in  
313 those cases, the spikes that are being suppressed are spikes that occasionally fall in phase with the modulatory inputs.  
314 In this sense, the modulatory inhibitory inputs are keeping the spiking entrained through suppression. This can happen  
315 regardless of whether  $f_R$  is greater than or lesser than  $f_B$ , and depends on how the intrinsic spike train aligns with the  
316 modulatory input spike trains.

317 Overall, these results make sense given the findings from the previous section showing that I-S3 cell synapses alone do  
318 not reliably cause phase advances. Specifically, recruitment of OLM cell spiking to certain inhibitory input frequencies  
319 is largely baseline spike rate-dependent because inhibitory perturbations mostly just cause phase delays. For example,  
320 if the baseline spike rate is much smaller than the input frequency, inhibitory perturbations will only cause suppression  
321 of spikes, and the PSD at the input frequency is more likely to drop. Likewise, if the baseline spike rate is much larger  
322 than the input frequency, then inhibitory perturbations will have minimal effects on spiking, as they may only suppress  
323 a small fraction of spikes. Thus, the spike resonant frequency is therefore largest when the baseline spike frequency is

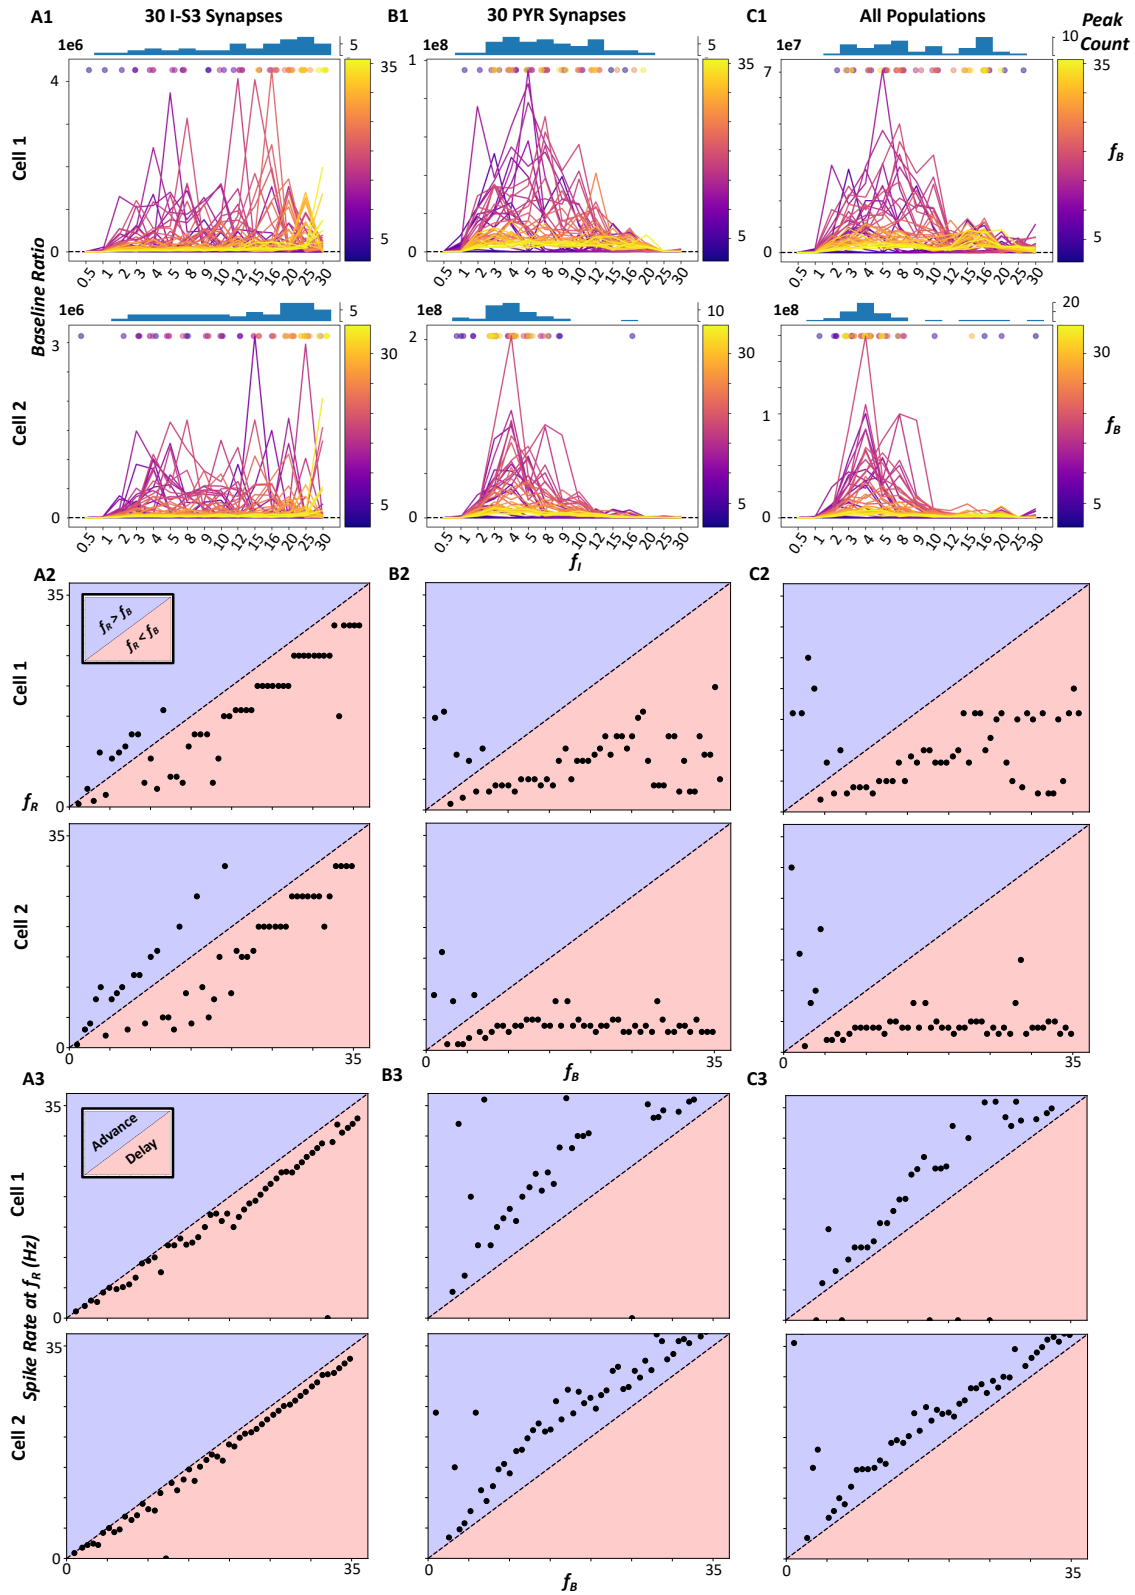

Figure 5. *In vitro* spike resonant frequency of OLM cell models due to inhibitory inputs, but not excitatory inputs, is dependent on the baseline spike rate.



(Continued) **A1-C1**: Baseline ratios (**A**: I-S3 cell inputs, **B**: PYR cell inputs, **C**: a combination of all inputs) computed across different modulation frequencies,  $f_I$ , and different holding currents (as shown by the range of different baseline frequencies,  $f_B$ , indicated by the colorbar). The colored dots plotted above the traces indicate the peak/resonant frequency (the color corresponds to the  $f_B$ ) and the histograms above the plots show the distributions of peak/resonant frequencies across holding currents and input frequencies. The dashed black lines indicate a baseline ratio of 1 (note that the y-axis scale is large, so this line appears very close to 0), i.e. the point at which the PSD before and after applying modulatory inputs does not change. Values larger than 1 indicate an increase in the PSD, and values smaller than 1 indicate a decrease in the PSD. **A2-C2**: Resonant frequencies,  $f_R$ , plotted against  $f_B$ . Dots in blue areas indicate simulations where  $f_R$  is greater than  $f_B$ , and dots in red areas indicate simulations where  $f_R$  is less than  $f_B$ . **A3-C3**: Spike rate at the  $f_R$  plotted against  $f_B$ . Dots in blue areas indicate simulations where the  $f_R$  spike rate is increased compared to  $f_B$  (i.e. consistent with phase advances), and dots in red areas indicate simulations where the  $f_R$  spike rate is decreased compared to  $f_B$  (i.e. consistent with phase delays).

324 near the inhibitory input frequency. These tests were also performed using MS inputs alone (not shown), which have  
325 larger IPSC amplitudes, and similar results are obtained.

326 In contrast, OLM cell spike resonance due to excitatory PYR cell inputs is consistently in the 2-15 Hz input frequency  
327 range, regardless of baseline spike frequency (**Fig. 5B1-B2**). However, the magnitude of the spike resonance is  
328 dependent on baseline spike frequency, with larger baseline spike frequencies having smaller spike resonances (**Fig.**  
329 **5B1**). In all cases the presence of excitatory inputs causes increases in spike rates, which is consistent with phase  
330 advances (**Fig. 5B3**). Similar findings are seen when including all input populations (**Fig. 5C1-C3**), suggesting that  
331 theta frequency (3-12 Hz) spike resonance *in vitro* is largely dictated by excitatory inputs when they are present and  
332 not so much inhibitory inputs alone. We note that our use of a lower number of PYR cell synapses could affect these  
333 results, but not likely in a drastic way given that PYR cell entrainment is not sensitive to the number of synapses (see  
334 **Fig. 1C**).

335 *Simulated in vivo states have theta frequency spike resonance only for inhibitory inputs*

336 We have previously simulated synaptic bombardment conditions on OLM cells that may be present during *in vivo*-like  
337 (IVL) states [see Methods and Guet-McCreight and Skinner (2020)]. This includes a random spread of synaptic  
338 locations from different input populations (**Fig. 6A**). In **Fig. 6B** we show what the OLM cell firing looks like under  
339 these baseline IVL conditions. We now investigate I-S3 cell control over OLM cells during these IVL states. Since  
340 we have already investigated I-S3 cell control over OLM cells in an *in vitro* context, we are able to compare whether  
341 or not the same level of control over OLM cell spiking might apply *in vivo*.

342 We perform the same spike resonance tests as in **Fig. 5**, but now under this IVL state. We see across all input population

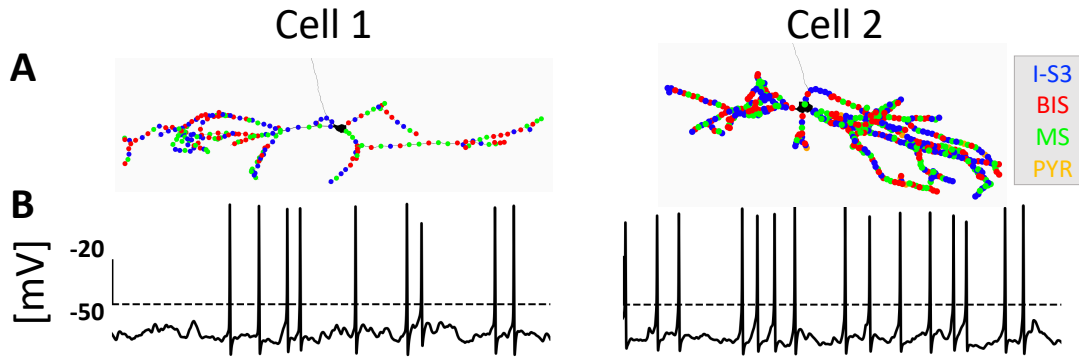

**Figure 6. Representative OLM cell firing during an *in vivo*-like state.** Input parameters are given in the methods. **A:** Example synaptic locations from the four different input populations with colors as indicated. Note that most of the axonal sections are not shown in these plots and the synaptic location dots on the shape plots are overlaid so some dots may appear less visible than others if they were plotted first (e.g. the PYR cell inputs). **B:** Voltage traces during example IVL states for cell 1 and cell 2.

343 types (I-S3 cells, PYR cells, and all input populations together) that there is a rightward shift in the resonant frequency  
344 distributions towards higher values where more if not all  $f_R$  values are larger than the  $f_B$  values (**Fig. 7A1-C1 &**  
345 **A2-C2**). That is, even when considering the smaller range of the baseline spike rates, the resonant frequencies are  
346 shifted towards higher input frequency ranges. We note that, as in the *in vitro* case, there is no change in the suppressing  
347 effects of inhibitory inputs (i.e. PIR spiking remains absent) or the excitable effects of PYR cell inputs on spike rates  
348 (**Fig. 7A3-C3**; though note that cell 1 with inputs from all populations can now occasionally cause phase delays  
349 instead of phase advances). The shift towards higher  $f_R$  values than in the *in vitro* case (i.e. **Fig. 5A2-C2** vs. **Fig.**  
350 **7A2-C2**) is possibly because of different aspects associated with the IVL state, including more irregular spiking  
351 patterns (i.e. spiking is no longer periodic; **Fig. 6B**), as well as a reduction in sensitivity due to a decrease in input  
352 resistance. In other words, irregular spike patterns at baseline can allow larger variabilities in  $f_R$  values, depending on  
353 how spike times align with modulatory excitatory and inhibitory inputs, and decreased input resistance can increase  
354 the magnitude of excitatory and inhibitory currents needed to modulate the cell models (i.e. increased  $f_R$  values).

355 Also, when considering the amplitudes of the baseline ratios, the IVL magnitudes (**Fig. 7A1-C1**) are considerably  
356 smaller than in the *in vitro* baseline ratios (**Fig. 5A1-C1**). This observation could also be due to an increase in currents  
357 in the model once it is put into an IVL state, which generates a lower input resistance and decreased sensitivity  
358 to rhythmically-timed inputs. In other words, higher input frequencies will be necessary to elicit spike resonance  
359 since there is a decrease in sensitivity. We note that we have previously established that the addition of synaptic  
360 bombardment leads to decreases in sensitivity to additional inputs (Guet-McCreight and Skinner, 2019), so it is not  
361 surprising that spiking resonance in OLM cells will be different during IVL states.

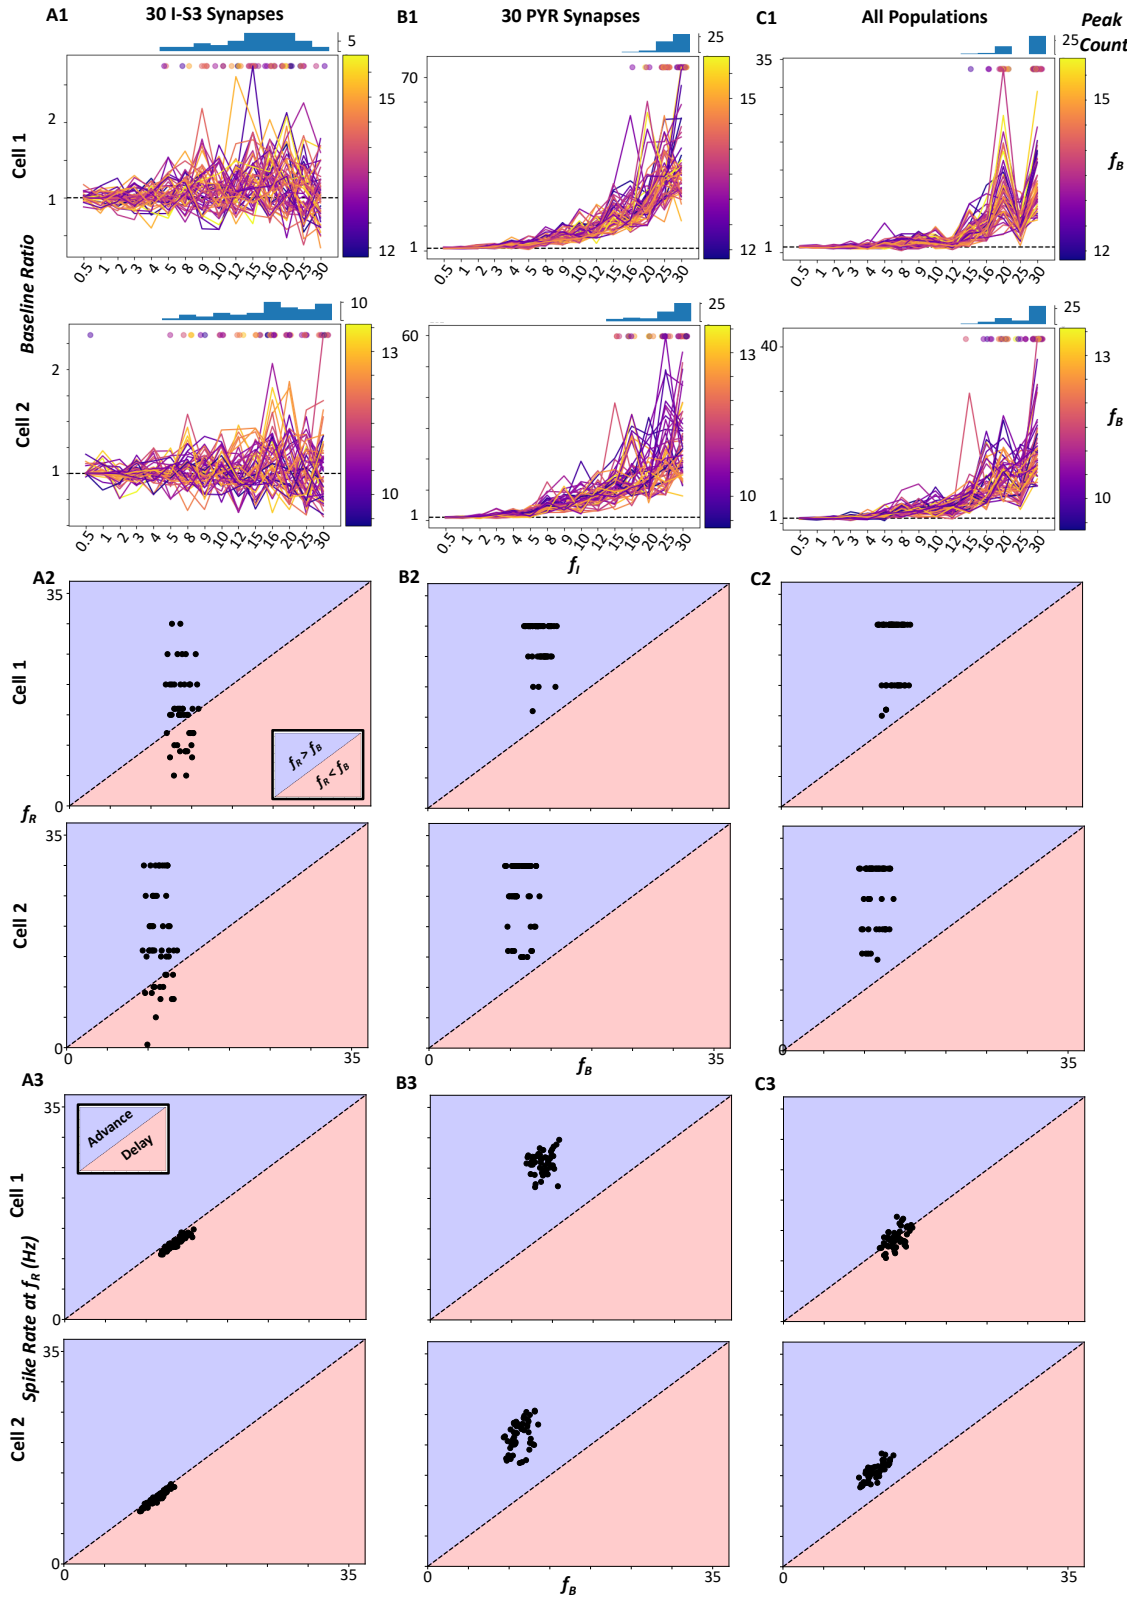

Figure 7. *In vivo* spike resonant frequency of OLM cells are in theta frequency ranges only for inhibitory inputs.

(Continued) **A1-C1**: Baseline ratio measurements across types of inputs (**A**: I-S3 cells, **B**: PYR cells, **C**: a combination of all inputs) during simulated *in vivo* states. Baseline ratios computed across different modulation frequency inputs (x-axis) and different IVL synaptic re-randomizations (as shown by the range of different baseline frequencies,  $f_B$  indicated by the colorbar). The colored dots plotted above the traces indicate the peak/resonant frequency (the color corresponds to the  $f_B$ ) and the histograms above the plots show the distributions of peak/resonant frequencies across random seeds and input frequencies. The dashed black lines indicate a baseline ratio of 1, i.e. the point at which the PSD before and after applying modulatory inputs does not change. Values larger than 1 indicate an increase in power, and values smaller than 1 indicate a decrease in the PSD. **A2-C2**: Resonant frequencies,  $f_R$ , plotted against  $f_B$ . Dots in blue areas indicate simulations where  $f_R$  is greater than  $f_B$ , and dots in red areas indicate simulations where  $f_R$  is less than  $f_B$ . **A3-C3**: Spike rate at the  $f_R$  plotted against  $f_B$ . Dots in blue areas indicate simulations where the  $f_R$  spike rate is increased compared to  $f_B$  (i.e. consistent with phase advances), and dots in red areas indicate simulations where the  $f_R$  spike rate is decreased compared to  $f_B$  (i.e. consistent with phase delays). Note that x and y axis scales are chosen to match the same scales as in **Fig. 5A2-C2 & A3-C3** for comparison purposes.

362 The results between the two OLM cell models are qualitatively similar, despite differences in morphologies and  
363 intrinsic parameters. One potential reason for this is the presence of dendritic  $I_H$ , and dendritic  $\text{Na}^+$  and  $\text{K}^+$  channels  
364 in both models, which would promote similar integration of synaptic inputs and action potential propagation and thus  
365 generate qualitatively similar results across both models. As well, our simulation results are quite similar between  
366 using I-S3 cell inputs or MS inputs (not shown), the latter of which have larger IPSC amplitudes (Chamberland et al.,  
367 2010). Indeed, there would not be a strict differentiation of incoming inhibitory inputs as modelled in these virtual  
368 networks.

#### 369 *Ramp-up of I-S3 cell inputs during theta (8 Hz) modulation can sharpen and modulate OLM cell recruitment*

370 In previous work we found that I-S3 cells are activated with a delay relative to theta-run epochs and spike during the  
371 rising to peak phases of theta rhythms (Luo et al., 2020). As well, it was predicted from modelling work that the  
372 timing of this phasic preference would be modulated by inputs from entorhinal cortex (EC; rising phase) and CA3  
373 (peak phase). As such, in this section we investigate the effects of a ramp-up of I-S3 cell activation (i.e. simulating a  
374 delay in I-S3 cell activation) on a per theta cycle basis during an ongoing theta rhythm (schematized in **Fig. 8**). We run  
375 simulations using the full IVL scenarios + 8 Hz modulatory inputs from all input population (I-S3, MS, BIS, and PYR  
376 cells) as seen previously (30 synapses per population; **Fig. 7, All Populations**). As before, we add a small amount of  
377 noise in all of the theta-timed inputs, as this is both more realistic than having perfectly-timed inputs, and was shown  
378 to enhance theta recruitment (Luo et al., 2020). As schematized in **Fig. 8**, starting at 2 s into the simulations until the  
379 end of the simulation (10 s), we add 7 I-S3 cell input spikes per cycle, which essentially ramps up the inhibition from  
380 I-S3 cells gradually. To consider possible shifts in balances of inputs from CA3 and EC, which can present a possible

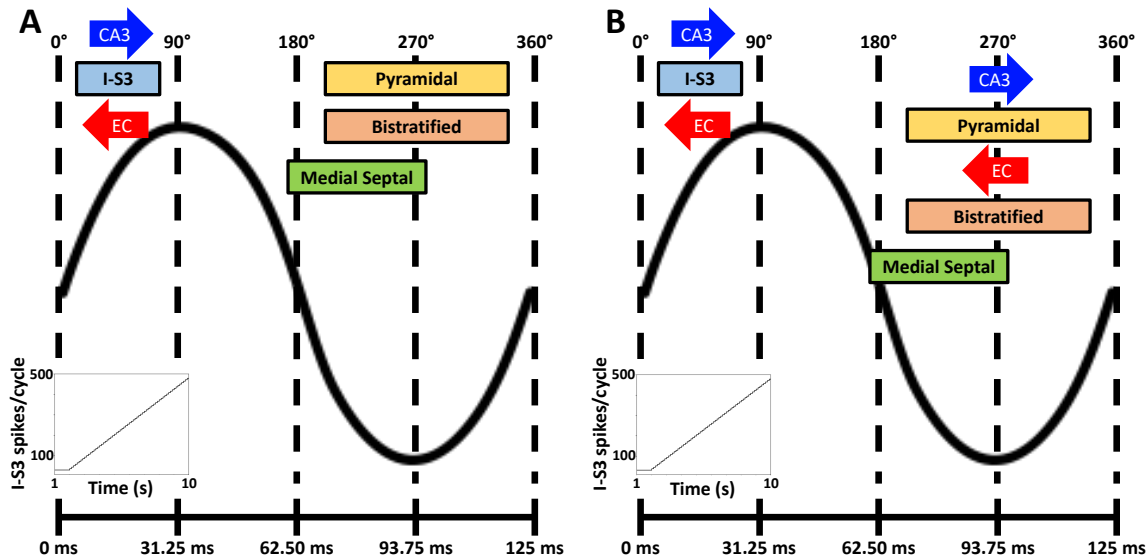

**Figure 8. Relative timing of different inputs to OLM cells during a theta cycle.** Schematic of simulations where, on top of IVL inputs, we add theta-timed inputs, a ramp-up of I-S3 cell inputs as each simulation progresses (depicted in the bottom-left subplots) as well as either CA3 (+15.625°) or EC (-15.625°)-modulated shifts in the timing of different input populations. **A:** In the first case we impose a shift in the timing of I-S3 cell inputs alone as I-S3 cell inputs are ramped up. **B:** In the second case we impose shifts in the timing of both I-S3 cell inputs as well as PYR cell inputs as I-S3 cell inputs are ramped up.

381 dis-inhibitory circuitry for switching between sensory inputs and memory consolidation inputs, we also explore shifts  
 382 in the timing of I-S3 cell inputs alone (**Fig. 8A**) or together with a shift in the timing of PYR cell inputs (**Fig. 8B**).  
 383 Note that synaptic location sites are chosen randomly for each addition, as described previously (Guet-McCreight and  
 384 Skinner, 2019). The rationale behind these simulations is that the majority of I-S3 cell activation occurs near run  
 385 ends, with a delay relative to the timing of activation of other neuron types during theta-run epochs, and so we want  
 386 to see the effect of a ramp-up of I-S3 cell inputs to OLM cell spiking during a behavioural context with ongoing theta  
 387 rhythms. Here we use five different random seeds for IVL synapses (of which one of the random seeds is shown in  
 388 **Fig. 9**), where IVL synapse locations and spike times are re-randomized.

389 In the simulations where we shift the timing of I-S3 cell inputs alone, the theta-timing of the OLM cell models do  
 390 not change across any of the conditions (i.e. no ramp-up, stronger EC inputs, even EC/CA3 inputs, or stronger CA3  
 391 inputs; **Fig. 9A1 & A3**). We do see a moderate decrease in the spike rate (**Fig. 9B1 & B3**), and an increase in the 8 Hz  
 392 power in the PSD (**Fig. 9C1 & C3**), across all conditions. More specifically, the enhancement in the PSD is strongest  
 393 when the timing of the I-S3 cell inputs is shifted towards the peak, corresponding with stronger inputs from CA3 (**Fig.**  
 394 **9C1 & C3**). This appears to be because inhibition occurring following the peak of theta is the most out-of-phase

395 with the trough of theta, which is when the OLM cell models spike, due to excitation from local PYR cells inputs  
396 (**Fig. 9A1 & A3**). Moreover, this also corresponds to the time at which the I-S3 cell inputs will, on average, be most  
397 out-of-phase with the OLM cell spike refractory period, which can allow a stronger response to inhibition (**Fig. 4**).  
398 As such, I-S3 cell inputs alone can sharpen OLM cell recruitment at theta frequencies by suppressing spikes that are  
399 out-of-phase with the theta-timing of OLM cell spiking. We note that when tested across five different random seeds,  
400 these same results are generated consistently (i.e. the effect of ramped up I-S3 cell inputs causing spike suppression,  
401 and the strongest 8 Hz power when modulated by CA3).

402 In the simulations where we shift the timing of I-S3 cell inputs together with PYR cell inputs, the theta-timing of the  
403 OLM cell models are shifted by the same phasic amount (**Fig. 9A2 & A4**). The interpretation in these simulations  
404 is that a shift in the timing of I-S3 cells due to inputs from either EC or CA3 will shift the dis-inhibitory window for  
405 PYR cells, and as such, their phasic timing will shift by the same amount. In these simulations we show that this  
406 network effect would also shift the timing of OLM cell spiking. Moreover, since the out-of-phase timing is relative  
407 to the phasic timing of when the OLM cell models are spiking, we see a similar PSD magnitude at 8 Hz regardless  
408 of the direction in which I-S3 and PYR cell inputs are shifted (**Fig. 9C2 & C4**). As well, the spike rates are again  
409 moderately decreased when compared to baseline (**Fig. 9B2 & B4**). Again, when tested across five different random  
410 seeds, the same results were generated consistently.

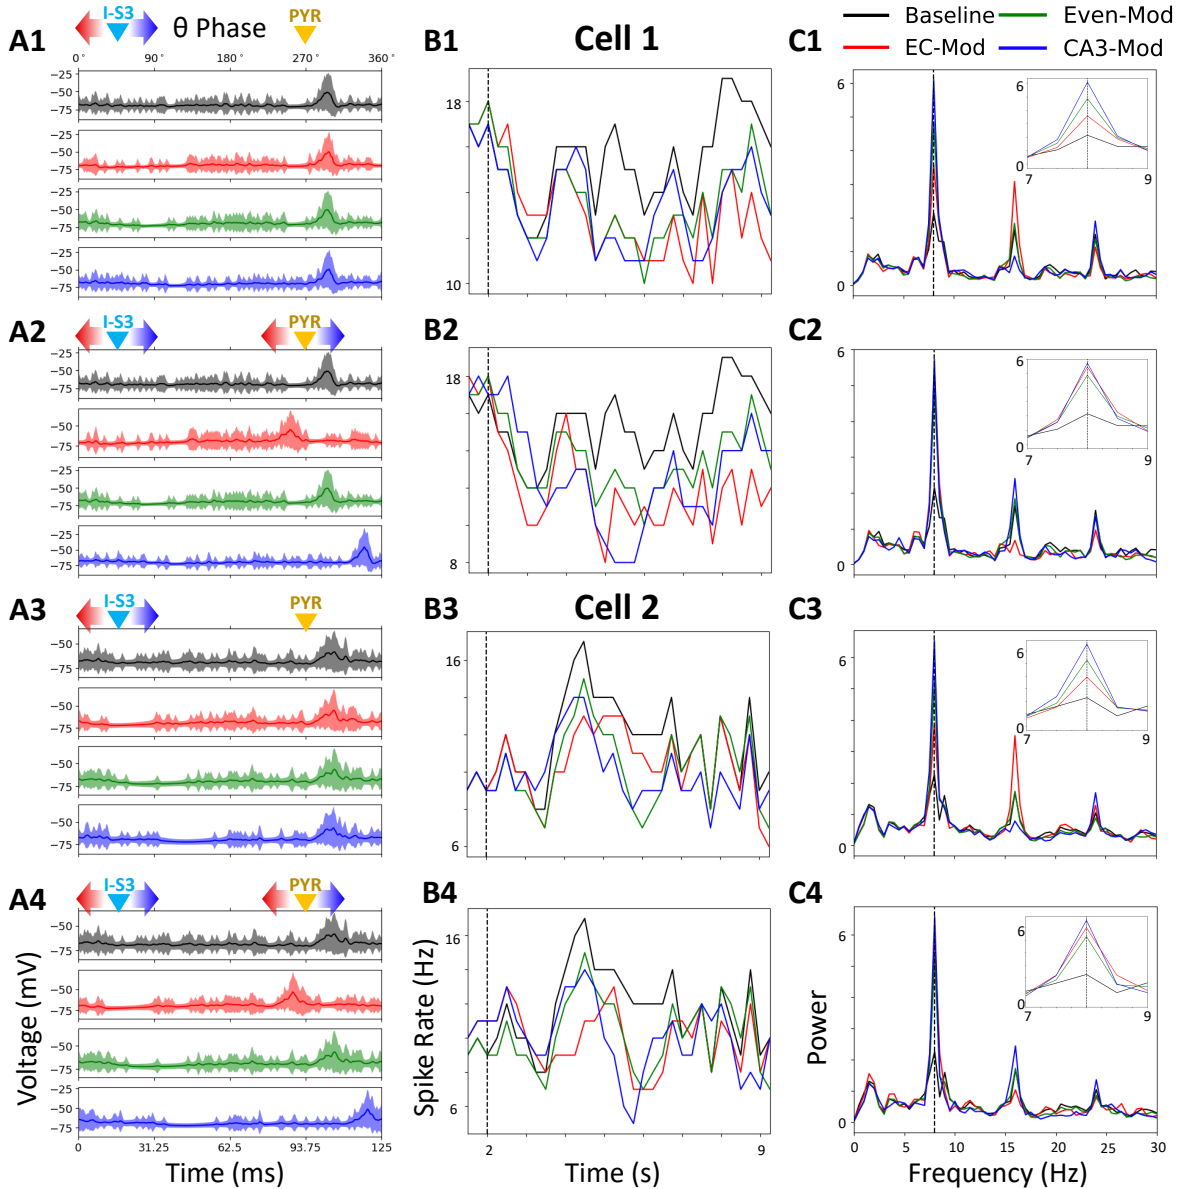

**Figure 9. Ramping up I-S3 cell inputs can sharpen and modulate OLM cell recruitment.** For each cell model (cell 1 = top 2 rows; cell 2 = bottom 2 rows), we investigate possible scenarios of OLM cell modulation via shifts in the timing of I-S3 and PYR cell inputs based on the timing of CA3 (blue) and EC (red) inputs (Luo et al., 2020). More specifically we look at the condition where the timing of I-S3 cell inputs are modulated on their own (panels A1-C1 & A3-C3), versus where the timing of I-S3 cell inputs are modulated together with the timing of PYR cell inputs (panels A2-C2 & A4-C4). **A:** Plots of the simulated OLM cell model voltage traces averaged across theta cycles. From top to bottom, these plots show the model simulations without a ramp-up (black), with an I-S3 cell ramp-up near the rising phase (red; i.e. stronger CA3 inputs), with an I-S3 cell ramp-up between the rising and peak phases (green; i.e. even inputs from CA3 and EC), as well as with an I-S3 cell ramp-up near the peak phase (blue; i.e. stronger EC inputs), while it is being modulated by 8 Hz frequency inputs from all input population types.

**(Continued)** To generate these average traces, we take the voltage traces (1,000 to 10,000 ms), split them each into their 72 theta cycles (i.e.  $9000\text{ ms}/125\text{ ms} = 72\text{ cycles}$ ), and then compute the average 125 ms theta cycle traces. Shaded areas show the amount of standard deviation above or below the mean. **B:** Resulting suppression on the spike rate of the OLM cell model throughout the simulations. **C:** The PSD of the voltage traces before and after applying a ramp-up of I-S3 cell inputs. The inset plot shows the magnified PSD between 7 to 9 Hz. Note that all simulations shown in this plot are performed using the same random seed for IVL synapse locations and IVL presynaptic spike times.



## 411 Discussion

412 Mapping identified inhibitory cell types to function and behaviour is a challenging endeavour. To address this, we  
413 took advantage of our previous studies interfacing experiment with modeling work of inhibitory cell types in the  
414 hippocampus. We focused on how specialized interneuron-selective cells, I-S3 cells, might exert their influence over  
415 OLM cells that have a demonstrated gating control between incoming ‘sensory’ and ongoing ‘memory’ information  
416 flow. We used two OLM cell models with parameters fit according to experimental data obtained from the same cell,  
417 populations of synapses with parameters specific to cell types that synapse onto OLM cells, knowledge of I-S3 cell  
418 firing *in vivo*, as well as a methodology for generating *in vivo*-like states.

419 *How do I-S3 cells control OLM cell spiking in vivo?*

420 Starting from the *in vitro* experimental observation of Tyan et al. (2014) in which OLM cells possibly exhibit PIR  
421 due to I-S3 cell inhibitory inputs, we considered two other possibilities. From simulated *in vitro* considerations, we  
422 found that I-S3 cell-mediated disinhibition of pyramidal cells seemed most likely to be the way in which I-S3 cells  
423 would exert their influence on OLM cell spike timing. I-S3 cell-mediated suppression of OLM cells would be part of  
424 enabling this contribution, but *not* PIR mechanisms. BIS cells could also contribute in these interactions. Thus, based  
425 on our explorations, we predict that the influence that I-S3 cells would have on OLM cells would be through spike  
426 suppression followed by enhanced excitation of OLM cells due to PYR cell disinhibition.

427 Interestingly, when simulating *in vivo* states in OLM cells, only inhibitory inputs, that would include those from I-S3  
428 cells, could lead to a spike resonance at theta frequencies. This was not the case during simulation of *in vitro* states  
429 though - there it was excitatory and not inhibitory inputs that could lead to theta frequency spike resonances. In  
430 previous modeling work, it was found that OLM cell spike resonance with inhibitory inputs in simplified, simulated  
431 *in vivo* states could occur at high or low theta frequencies depending on whether dendritic h-channels were present or  
432 not, respectively (Sekulić and Skinner, 2017). Here, we used our state-of-the-art OLM cell models that were shown  
433 to necessarily have dendritic h-channels (Sekulic et al., 2020), a different metric for gauging spike resonance (i.e.  
434 the maximal baseline ratio), a series of different baseline spike rates [i.e. instead of just 2.5 Hz, as in Sekulić and  
435 Skinner (2017)], and synaptic parameters estimated from actual input populations measured experimentally. Based  
436 on the results here, we predict that theta frequency spike resonance could occur in OLM cells *in vivo* with incoming  
437 inhibitory I-S3 cell inputs, as well as from other rhythmic inhibitory inputs like MS and BIS cell inputs.

438 From previous work, we know that I-S3 cells exhibit a delay relative to theta-run epochs, with a phasic preference  
439 towards the rising/peak phases of theta. Simulating a ramp-up of I-S3 cell spiking in our virtual networks, we found  
440 that we could obtain a sharpening of the timing of OLM cells during theta rhythms, which could contribute to shaping  
441 pyramidal cell place fields (Royer et al., 2012). In fact, silencing SOM+ cells increases PYR cell burst spiking during

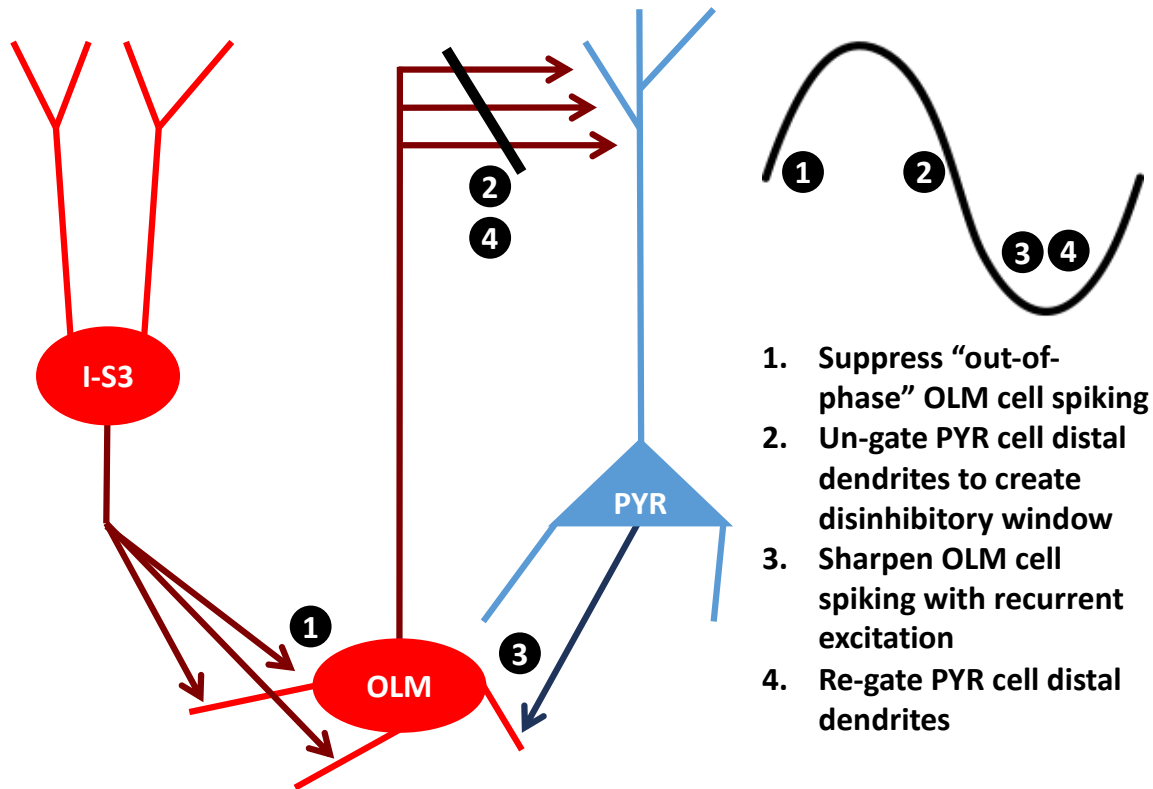

**Figure 10. I-S3 cells are fit to suppress OLM cell spiking and disinhibit pyramidal cells.**

442 place field traversals in awake mice (Royer et al., 2012), and also un-gates synaptic activation along pyramidal cell  
443 apical dendrites (Lovett-Barron et al., 2012). In line with this, optogenetic silencing of VIP+ cells, which promotes  
444 activation of SOM+ cells, dampens both the reshaping of PYR cell place fields and learning of reward site locations  
445 (Turi et al., 2019). Previous modeling has also shown that OLM cells, via network pathways that include BIS cells,  
446 were key to LFP signal robustness of ongoing intrinsic theta rhythms (Chatzikalymniou and Skinner, 2018). Thus,  
447 I-S3 cell contributions, via OLM and BIS cells, could be essential for the existence of robust theta rhythms.

448 Based on all of this, our proposition for I-S3 cell contributions is illustrated in **Fig. 10** in a series of steps. We predict  
449 that I-S3 cells cause phase delays in OLM cell spiking by spike suppression, as opposed to PIR-mediated phase  
450 advances (step 1). This would lead to PYR cell spiking due to disinhibition at a particular phase of theta rhythms  
451 (step 2), which would subsequently dictate the timing of the OLM cell spiking through excitation (step 3), leading to  
452 re-gating of inputs at distal dendrites (step 4).

### 453 *Experimental Investigations*

454 The predictions from our computational studies lead to several suggestions for experimental investigation. Results  
455 from Tyan et al. (2014) can be re-tested by performing frequency-modulated optogenetic stimulation of CR+ cells  
456 while recording from OLM cells in the presence of excitatory synaptic blockers. If OLM cell frequency-modulated  
457 spiking is then lost, the interpretation would be that the frequency modulation was due to feedforward disinhibition-driven  
458 excitation onto OLM cells. Additionally, instead of recording from OLM cells during these tests, one could record  
459 from PYR cells to verify frequencies at which I-S3 cell activation might lead to disinhibited spiking in PYR cells, if  
460 at all.

461 Another suggestion would be to perform closed-loop feedback stimulation with the theta-filtered LFP as has been done  
462 previously (Siegle and Wilson, 2014), but with photo-activation of CR+ cells at specific phases of theta. One could  
463 stimulate CR+ cells at phases closer to the peak versus the trough of theta, to assess whether the phasic timing of CR+  
464 cells has an effect on the encoding and retrieval of information during a learning test such as the T-maze task. Our  
465 results predict an ungating of pyramidal cells during theta phases that follow the activation of CR+ cells. On average  
466 (but with a large variance), I-S3 cells spike near the rising to peak phases of theta (Luo et al., 2020) which follows  
467 excitation from EC and precedes excitation from CA3. As such, if stimulated to spike at earlier phases, integration of  
468 inputs from EC by pyramidal cells could be favoured to promote sensory encoding. Likewise, if stimulated to spike at  
469 later phases, integration of inputs from CA3 by pyramidal cells could be favoured to promote retrieval of information.

470 Further, it is now clear that the location of OLM cells along the dorsoventral axis of the hippocampus matters in terms  
471 of whether one has high or low theta rhythms (Hilscher et al., 2019; Mikulovic et al., 2018; Siwani et al., 2018),  
472 since there may be biophysical and connectivity differences with OLM cells in these different locations. As already  
473 noted above, modeling studies have suggested that whether h-channels are present or not in the dendrites of OLM  
474 cells could ‘control’ the theta frequency spike resonance. Here, we used OLM cell models with dendritic h-channels  
475 developed from intermediate CA1 mouse hippocampal data (Sekulic et al., 2020), and our PRC explorations indicated  
476 that current changes with inhibitory perturbations were mostly due to h-channels.

### 477 *Theoretical and Modeling Considerations*

478 To examine the ability of OLM cells to exhibit phase advances or delays with inhibitory perturbations, we used PRCs  
479 but with noted differences from theoretical PRC studies that typically consider a square-pulse stimulation and use  
480 single compartment models. Here we have detailed multi-compartment models with a full suite of biophysical channel  
481 types. Since we wanted to situate our explorations in a realistic biological setting, our inhibitory perturbations took the  
482 form of dendritically distributed inhibitory synaptic inputs on the OLM cell models with synaptic features estimated  
483 from experiment. These PRCs serve as an approximation for how OLM cells would respond to repeated ‘periodic

484 forcing' (Rinzel and Ermentrout, 1989), and they show that incoming inhibitory inputs mostly serve to slow down the  
485 firing of OLM cells. Moreover, by also examining the underlying changes in the biophysical currents of OLM cells,  
486 we found that h-channel changes dominate, but they are not sufficient to lead a phase advance rather than a phase  
487 delay.

488 To allow a focus on cellular details, we carried out virtual network explorations. This allowed us to directly compare  
489 and translate *in vitro* aspects to *in vivo* to come up with our proposed specialized contribution of I-S3 cells. Since *in*  
490 *vivo* recordings of specialized cell types is highly challenging, computational studies to develop hypotheses, predict  
491 and guide experimental studies are strongly needed. However, a virtual network does not directly model all of the  
492 interacting network effects that can occur consequentially as a result of changes in the activation of the cell type  
493 of interest. Despite these properties not being modelled explicitly, this approach offers the benefit of being able  
494 to dissect out putative mechanisms without having to build a full-blown circuit model initially. We also note that  
495 our interpretations are in line with previous network modelling showing that VIP/SOM connectivity is sufficient for  
496 switching circuit activity between two processing modes where synaptic inputs in pyramidal cells are either integrated  
497 or suppressed (Hertäg and Sprekeler, 2019; Wang et al., 2004; Yang et al., 2016).

## References

- 498  
500 Acsády L, Görcs TJ, Freund TF (1996) Different populations of vasoactive intestinal polypeptide-immunoreactive  
509 interneurons are specialized to control pyramidal cells or interneurons in the hippocampus.  
502 *Neuroscience* 73:317–334.
- 503 Ascoli GA, Gasparini S, Medinilla V, Migliore M (2010) Local Control of Postinhibitory Rebound Spiking in CA1  
504 Pyramidal Neuron Dendrites. *Journal of Neuroscience* 30:6434–6442.
- 505 Bezaire MJ, Raikov I, Burk K, Vyas D, Soltesz I (2016) Interneuronal mechanisms of hippocampal theta oscillations  
506 in a full-scale model of the rodent CA1 circuit. *eLife* 5:e18566.
- 507 Bezaire MJ, Soltesz I (2013) Quantitative assessment of CA1 local circuits: Knowledge base for  
508 interneuron-pyramidal cell connectivity. *Hippocampus* 23:751–785.
- 509 Buzsáki G (2002) Theta Oscillations in the Hippocampus. *Neuron* 33:325–340.
- 510 Carnevale NT, Hines ML (2006) *The NEURON Book* Cambridge University Press, Cambridge, UK ; New York, 1  
511 edition edition.
- 512 Cembrowski MS, Spruston N (2019) Heterogeneity within classical cell types is the rule: lessons from hippocampal  
513 pyramidal neurons. *Nature Reviews Neuroscience* 20:193.
- 514 Chamberland S, Salesse C, Topolnik D, Topolnik L (2010) Synapse-Specific Inhibitory Control of Hippocampal  
515 Feedback Inhibitory Circuit. *Frontiers in Cellular Neuroscience* 4.
- 516 Chamberland S, Topolnik L (2012) Inhibitory control of hippocampal inhibitory neurons. *Frontiers in*  
517 *Neuroscience* 6.
- 518 Chatzikalymniou AP, Skinner FK (2018) Deciphering the Contribution of Oriens-Lacunosum/Moleculare  
519 (OLM) Cells to Intrinsic Theta Rhythms Using Biophysical Local Field Potential (LFP) Models.  
520 *eNeuro* pp. ENEURO.0146–18.2018.
- 521 Colgin LL (2016) Rhythms of the hippocampal network. *Nature Reviews Neuroscience* 17:239–249.
- 522 Francavilla R, Villette V, Luo X, Chamberland S, Muñoz-Pino E, Camiré O, Wagner K, Kis V, Somogyi P, Topolnik  
523 L (2018) Connectivity and network state-dependent recruitment of long-range VIP-GABAergic neurons in the mouse  
524 hippocampus. *Nature Communications* 9:5043.
- 525 Guet-McCreight A, Skinner FK (2019) Using computational models to predict in vivo synaptic inputs to interneuron  
526 specific 3 (IS3) cells of CA1 hippocampus that also allow their recruitment during rhythmic states. *PLOS*  
527 *ONE* 14:e0209429.

- 528 Guet-McCreight A, Skinner FK (2020) Computationally going where experiments cannot: a dynamical assessment  
529 of dendritic ion channel currents during in vivo-like states. *F1000Research* 9:180.
- 530 Guet-McCreight A, Skinner FK, Topolnik L (2020) Common Principles in Functional Organization of VIP/Calretinin  
531 Cell-Driven Disinhibitory Circuits Across Cortical Areas. *Frontiers in Neural Circuits* 14 Publisher: Frontiers.
- 532 Hangya B, Borhegyi Z, Szilágyi N, Freund TF, Varga V (2009) GABAergic Neurons of the Medial Septum Lead the  
533 Hippocampal Network during Theta Activity. *Journal of Neuroscience* 29:8094–8102.
- 534 Harris KD, Hochgerner H, Skene NG, Magno L, Katona L, Gonzales CB, Somogyi P, Kessaris N, Linnarsson S,  
535 Hjerling-Leffler J (2018) Classes and continua of hippocampal CA1 inhibitory neurons revealed by single-cell  
536 transcriptomics. *PLOS Biology* 16:e2006387.
- 537 Hertäg L, Sprekeler H (2019) Amplifying the redistribution of somato-dendritic inhibition by the interplay of three  
538 interneuron types. *PLOS Computational Biology* 15:e1006999.
- 539 Hilscher MM, Nogueira I, Mikulovic S, Kullander K, Leão RN, Leão KE (2019) Chrna2-OLM interneurons display  
540 different membrane properties and h-current magnitude depending on dorsoventral location. *Hippocampus* .
- 541 Katona L, Lapray D, Viney TJ, Oulhaj A, Borhegyi Z, Micklem BR, Klausberger T, Somogyi P (2014) Sleep  
542 and Movement Differentiates Actions of Two Types of Somatostatin-Expressing GABAergic Interneuron in Rat  
543 Hippocampus. *Neuron* 82:872–886.
- 544 Kepecs A, Fishell G (2014) Interneuron cell types are fit to function. *Nature* 505:318–326.
- 545 Kispersky TJ, Fernandez FR, Economo MN, White JA (2012) Spike Resonance Properties in Hippocampal O-LM  
546 Cells Are Dependent on Refractory Dynamics. *The Journal of Neuroscience* 32:3637–3651.
- 547 Klausberger T, Somogyi P (2008) Neuronal Diversity and Temporal Dynamics: The Unity of Hippocampal Circuit  
548 Operations. *Science* 321:53–57.
- 549 Leão RN, Mikulovic S, Leão KE, Munguba H, Gezelius H, Enjin A, Patra K, Eriksson A, Loew LM, Tort ABL,  
550 Kullander K (2012) OLM interneurons differentially modulate CA3 and entorhinal inputs to hippocampal CA1  
551 neurons. *Nature Neuroscience* 15:1524–1530.
- 552 Lovett-Barron M, Turi GF, Kaifosh P, Lee PH, Bolze F, Sun XH, Nicoud JF, Zemelman BV, Sternson SM,  
553 Losonczy A (2012) Regulation of neuronal input transformations by tunable dendritic inhibition. *Nature*  
554 *Neuroscience* 15:423–430.
- 555 Luo X, Guet-McCreight A, Villette V, Francavilla R, Marino B, Chamberland S, Skinner FK, Topolnik L (2020)  
556 Synaptic Mechanisms Underlying the Network State-Dependent Recruitment of VIP-Expressing Interneurons in the  
557 CA1 Hippocampus. *Cerebral Cortex* .

- 558 Maccaferri G, McBain CJ (1996) The hyperpolarization-activated current (I<sub>h</sub>) and its contribution to pacemaker  
559 activity in rat CA1 hippocampal stratum oriens-alveus interneurons. *The Journal of Physiology* 497:119–130.
- 560 Markram H, Toledo-Rodriguez M, Wang Y, Gupta A, Silberberg G, Wu C (2004) Interneurons of the neocortical  
561 inhibitory system. *Nature Reviews Neuroscience* 5:793.
- 562 Mikulovic S, Restrepo CE, Siwani S, Bauer P, Pupe S, Tort ABL, Kullander K, Leão RN (2018) Ventral hippocampal  
563 OLM cells control type 2 theta oscillations and response to predator odor. *Nature Communications* 9:3638.
- 564 Mizuseki K, Sirota A, Pastalkova E, Buzsáki G (2009) Theta Oscillations Provide Temporal Windows for Local  
565 Circuit Computation in the Entorhinal-Hippocampal Loop. *Neuron* 64:267–280.
- 566 Pelkey KA, Chittajallu R, Craig MT, Tricoire L, Wester JC, McBain CJ (2017) Hippocampal GABAergic Inhibitory  
567 Interneurons. *Physiological Reviews* 97:1619–1747.
- 568 Rinzel J, Ermentrout GB (1989) Analysis of neural excitability and oscillations In Koch C, Segev I, editors, *Methods*  
569 *in Neuronal Modeling*, pp. 135–169. MIT Press, Cambridge, MA, USA.
- 570 Royer S, Zemelman BV, Losonczy A, Kim J, Chance F, Magee JC, Buzsáki G (2012) Control of timing, rate and  
571 bursts of hippocampal place cells by dendritic and somatic inhibition. *Nature Neuroscience* 15:769–775.
- 572 Schultheiss NW, Prinz AA, Butera RJ, editors (2011) *Phase Response Curves in Neuroscience: Theory, Experiment,*  
573 *and Analysis* Springer, New York, 2012 edition edition.
- 574 Sekulic V, Yi F, Garrett T, Guet-McCreight A, Lawrence JJ, Skinner FK (2020) Integration of within-cell  
575 experimental data with multi-compartmental modeling predicts h-channel densities and distributions in hippocampal  
576 OLM cells. *Frontiers in Cellular Neuroscience* 14 Publisher: Frontiers.
- 577 Sekulić V, Skinner FK (2017) Computational models of O-LM cells are recruited by low or high theta frequency  
578 inputs depending on h-channel distributions. *eLife* 6:e22962.
- 579 Siegle JH, Wilson MA (2014) Enhancement of encoding and retrieval functions through theta phase-specific  
580 manipulation of hippocampus. *eLife* 3:e03061.
- 581 Sivagnanam S, Majumdar A, Yoshimoto K, Astakhov V, B A, Martone M, Carnevale NT (2013) *Introducing The*  
582 *Neuroscience Gateway*, Vol. 993 of CEUR Workshop Proceedings of *CEUR Workshop Proceedings*.
- 583 Siwani S, França ASC, Mikulovic S, Reis A, Hilscher MM, Edwards SJ, Leão RN, Tort ABL, Kullander K (2018)  
584 OLM $\alpha$ 2 Cells Bidirectionally Modulate Learning. *Neuron* 99:404–412.e3.
- 585 Tremblay R, Lee S, Rudy B (2016) GABAergic Interneurons in the Neocortex: From Cellular Properties to Circuits.  
586 *Neuron* 91:260–292.

587 Turi GF, Li WK, Chavlis S, Pandi I, O'Hare J, Priestley JB, Grosmark AD, Liao Z, Ladow M, Zhang JF, Zemelman  
588 BV, Poirazi P, Losonczy A (2019) Vasoactive Intestinal Polypeptide-Expressing Interneurons in the Hippocampus  
589 Support Goal-Oriented Spatial Learning. *Neuron* 101:1150–1165.e8.

590 Tyan L, Chamberland S, Magnin E, Camiré O, Francavilla R, David LS, Deisseroth K, Topolnik L (2014) Dendritic  
591 Inhibition Provided by Interneuron-Specific Cells Controls the Firing Rate and Timing of the Hippocampal Feedback  
592 Inhibitory Circuitry. *Journal of Neuroscience* 34:4534–4547.

593 Varga C, Golshani P, Soltesz I (2012) Frequency-invariant temporal ordering of interneuronal discharges during  
594 hippocampal oscillations in awake mice. *Proceedings of the National Academy of Sciences* 109:E2726–E2734.

595 Wang XJ, Tegnér J, Constantinidis C, Goldman-Rakic PS (2004) Division of labor among distinct subtypes  
596 of inhibitory neurons in a cortical microcircuit of working memory. *Proceedings of the National Academy of  
597 Sciences* 101:1368–1373.

598 Yang GR, Murray JD, Wang XJ (2016) A dendritic disinhibitory circuit mechanism for pathway-specific gating.  
599 *Nature Communications* 7:1–14.

600 Zemankovics R, Káli S, Paulsen O, Freund TF, Hájos N (2010) Differences in subthreshold resonance of hippocampal  
601 pyramidal cells and interneurons: the role of h-current and passive membrane characteristics. *The Journal of  
602 Physiology* 588:2109–2132.

603 Zeng H, Sanes JR (2017) Neuronal cell-type classification: challenges, opportunities and the path forward. *Nature  
604 Reviews Neuroscience* 18:530.

## 605 **Figure Legends**

606 **Figure 1 Potential mechanisms through which I-S3 cell activation can control OLM cell spiking.**

607

608 **Figure 2 Example locations of synaptic inputs.**

609

610 **Figure 3 I-S3 cell inputs alone cannot elicit PIR spiking in OLM cells at higher-than-baseline spike rate  
611 frequencies.**

612

613 **Figure 4 Inhibitory perturbations alone mostly just cause phase delays in OLM cell models.**

614

615 **Figure 5 *In vitro* spike resonant frequency of OLM cell models due to inhibitory inputs, but not excitatory  
616 inputs, is dependent on the baseline spike rate.**



617

618 **Figure 6 Representative OLM cell firing during an *in vivo*-like state.**

619

620 **Figure 7 *In vivo* spike resonant frequency of OLM cells are in theta frequency ranges only for inhibitory inputs.**

621

622 **Figure 8 Relative timing of different inputs to OLM cells during a theta cycle.**

623

624 **Figure 9 Ramping up I-S3 cell inputs can sharpen and modulate OLM cell recruitment.**

625

626 **Figure 10 I-S3 cells are fit to suppress OLM cell spiking and disinhibit pyramidal cells.**

627

628
